# 1 **Complex feline disease mapping using a dense genotyping array**

2 Isabel Hernandez<sup>1¶</sup>, Jessica J. Hayward<sup>2¶\*</sup>, Jeff A. Brockman<sup>3</sup>, Michelle E. White<sup>4</sup>, Lara  
3 Mouttham<sup>5</sup>, Elizabeth A. Wilcox<sup>5</sup>, Susan Garrison<sup>5</sup>, Marta G. Castelhamo<sup>5</sup>, John P. Loftus<sup>1</sup>, Filipe  
4 Espinheira Gomes<sup>1</sup>, Cheryl Balkman<sup>1</sup>, Marjory B. Brooks<sup>6</sup>, Nadine Fiani<sup>1</sup>, Marnin Forman<sup>7</sup>, Tom  
5 Kern<sup>1</sup>, Bruce Kornreich<sup>1</sup>, Eric Ledbetter<sup>1</sup>, Santiago Peralta<sup>1</sup>, Angela M. Struble<sup>1</sup>, Lisa Caligiuri<sup>1</sup>,  
6 Elizabeth Corey<sup>5</sup>, Lin Lin<sup>5</sup>, Julie Jordan<sup>5</sup>, Danny Sack<sup>1</sup>, Adam R. Boyko<sup>2</sup>, Leslie A. Lyons<sup>8</sup>, Rory  
7 J. Todhunter<sup>1</sup>

8

9 <sup>1</sup>Department of Clinical Sciences, College of Veterinary Medicine, Cornell University, Ithaca,  
10 New York, United States of America

11  
12 <sup>2</sup>Department of Biomedical Sciences, College of Veterinary Medicine, Cornell University, Ithaca,  
13 New York, United States of America

14  
15 <sup>3</sup>Pet Nutrition Center, Hill's Pet Nutrition, Topeka, Kansas, United States of America

16  
17 <sup>4</sup>Bioinformatics and Integrative Biology, University of Massachusetts Medical School,  
18 Worcester, Massachusetts, United States of America and Vertebrate Genomics Broad  
19 Institute of MIT and Harvard, Cambridge, Massachusetts, United States of America

20  
21 <sup>5</sup>Cornell Veterinary Biobank, College of Veterinary Medicine, Cornell University, Ithaca, New  
22 York, United States of America

23  
24 <sup>6</sup>Department of Population Medicine and Diagnostic Services, College of Veterinary Medicine,  
25 Cornell University, Ithaca, New York, United States of America

26  
27 <sup>7</sup>Cornell University Veterinary Specialists, Stamford, Connecticut, United States of America

28  
29 <sup>8</sup>Department of Veterinary Medicine & Surgery, College of Veterinary Medicine, University of  
30 Missouri, Columbia, Missouri, United States of America

31

32 \*Corresponding author:

33 Email: [jessica.hayward@cornell.edu](mailto:jessica.hayward@cornell.edu)

34

35 ¶These authors contributed equally to this work.

36

37 Short title: Feline complex disease mapping

38

39 Keywords: feline complex disease, genome-wide association study, biobank

40

## 41 **Abstract**

42           The current feline genotyping array of 63k single nucleotide polymorphisms has proven its  
43 utility within breeds, and its use has led to the identification of variants associated with Mendelian  
44 traits in purebred cats. However, compared to single gene disorders, association studies of complex  
45 diseases, especially with the inclusion of random bred cats with relatively low linkage  
46 disequilibrium, require a denser genotyping array and an increased sample size to provide  
47 statistically significant associations. Here, we undertook a multi-breed study of 1,122 cats, most  
48 of which were admitted and phenotyped for nine common complex feline diseases at the Cornell  
49 University Hospital for Animals. Using a proprietary 340k single nucleotide polymorphism  
50 mapping array, we identified significant genome-wide associations with hyperthyroidism, diabetes  
51 mellitus, and eosinophilic keratoconjunctivitis. These results provide genomic locations for variant  
52 discovery and candidate gene screening for these important complex feline diseases, which are  
53 relevant not only to feline health, but also to the development of disease models for comparative  
54 studies.

55

## 56 **Introduction**

57           There are 365 hereditary disorders of cats listed on OMIA (Online Mendelian Inheritance  
58 in Animals, <https://omia.org/home/> accessed June 7th, 2021), of which only 119 (32.6%) are  
59 Mendelian traits and only 136 (37.3%) have likely causal variants. Clearly, there are a large  
60 number of feline diseases whose genetic basis is still unknown. Moreover, 230 of these hereditary  
61 feline disorders are potentially good models for human disease.

62

63 Random bred cats are the most common cats in American households, accounting for 84% of the  
64 population in the United States [1]. Random bred cats comprised 89% of cats admitted the Cornell  
65 University Hospital for Animals (CUHA) in the last 15 years, thus providing an important  
66 spontaneous source of DNA for increasing sample sizes of genetic mapping studies.

67

68 Compared to purebreds, random bred cats have shorter linkage disequilibrium, due to the large  
69 number of generations since the origin of the random bred cat population, with archaeological  
70 evidence of a human and cat burial site as old as 9,500 years [2]. The genetic heterogeneity of  
71 random bred cats, the additive effect of many genes, and their environmental interaction makes  
72 discovering variants contributing to complex diseases more challenging than for Mendelian traits  
73 [3]. At least a few Mendelian traits have been mapped in random bred cats, including spongy  
74 encephalopathy, Glanzmann thrombasthenia, and inflammatory linear verrucous epidermal nevus  
75 [4–6]. Additional factors that make the discovery of complex disease genetic mechanisms difficult  
76 include sample size, phenotyping accuracy, mapping array marker density, and access to whole  
77 genome sequences for variant discovery [7].

78

79 The current 63k Illumina feline single nucleotide polymorphism (SNP) mapping array has been  
80 used successfully within breeds to map variants for Mendelian diseases. Examples include the  
81 discovery of the *WNK4* variant that causes hypokalemia in Burmese cats [8], a region on  
82 chromosome E1 associated with progressive retinal atrophy in Persian cats [9], a causal variant in  
83 *COLQ* for hereditary myopathy in Devon Rex and Sphynx cats [10], refinement of the region on  
84 chromosome B4 associated with craniofacial structure and frontonasal dysplasia in Burmese cats  
85 [11], a region on chromosome A3 associated with an inherited neurologic syndrome in a family of

86 Oriental cats [12], and a dominant channelopathy variant causing osteochondrodysplasia in  
87 Scottish Fold cats [13]. This array has also been used in a limited number of within-breed genome  
88 wide association studies (GWAS) for complex disease [14,15], but there are no reports of GWAS  
89 performed with an across-breed design.

90

91 Here, we genotyped 1,122 cats using a one-time proprietary Illumina high density 340k SNP  
92 mapping array designed by Hill's Pet Nutrition, in an effort to identify genetic underpinnings for  
93 nine complex diseases. Our samples consisted of a mix of 31 purebreds and 905 random bred cats,  
94 the majority of which were domestic shorthairs. This array improves upon the density of the current  
95 commercial 63k array by a factor of >5. As quality control and to validate the accuracy of the 340k  
96 array, we performed a GWAS for the *Orange* coat color locus and for Factor XII deficiency, which  
97 are known to be associated with a region on chromosomes X and A1, respectively [16–19].

98

99 The complex diseases included in this study were hypertrophic cardiomyopathy (HCM),  
100 hyperthyroidism, diabetes mellitus (DM), chronic kidney disease (CKD), chronic enteropathy,  
101 inflammatory bowel disease (IBD), small cell alimentary lymphoma (SCAL), hypercalcemia, and  
102 feline eosinophilic keratoconjunctivitis (FEK). These diseases are among the most common  
103 complex diseases of cats admitted to CUHA and are some of the most common and important  
104 feline diseases in clinical veterinary practice [20].

105

106 We used both a linear mixed model (LMM) and a multi-locus method called Fixed and random  
107 model Circulating Probability Unification (FarmCPU) to perform GWAS, and together identified  
108 loci significantly associated with hyperthyroidism, DM, FEK, and IBD. Additionally, we

109 identified suggestive loci for the diseases HCM and hypercalcemia. Here, we describe the largest  
110 genetic mapping study of feline complex diseases with the densest mapping array ever performed.

111

## 112 **Results**

### 113 **Validation of array**

114 Principal component analysis (PCA) was performed using all genotyped cats that passed  
115 quality control, and showed that there was no batch effect due to the 11 sequential plates used for  
116 genotyping (Fig. 1A). The first two components, principal component (PC)1 and PC2, explained  
117 31.3% of the total genetic variation. The cluster that separates on PC2 in this PCA includes 40 cats  
118 from a closed colony of domestic shorthair (DSH) cats from a local breeding facility, genotyped  
119 mainly on plates 7 and 11. Principal component analysis of the genotypes of all 221 purebred cats  
120 showed that PC1 separates western breeds, like Manx and Persian, from eastern breeds, like  
121 Tonkinese and Burmese (Fig. 1B). This eastern-western distribution of breeds is also seen on PC1  
122 of the PCA of all cats (Fig. 1A) and has been shown previously using the 63k genotyping array  
123 [16,21–23]. PC2 of the purebred cat PCA separates the Devon Rex cats from the other breeds. The  
124 first two components of the purebred cat PCA explained only 16.4% of the total genetic variation,  
125 much less than the 38.4% explained by the first two components of a PCA using the 63k array  
126 [23].

127

128 **Figure 1. Principal Component Analysis of cat genetic structure.** Dimensions PC1 and PC2  
129 are shown. (A) All 1,122 cats that passed QC, color-coded by genotyping plate (1 to 11), showing  
130 the absence of a batch effect. PC1 shows the eastern-western breed distribution. The cluster of cats  
131 that separate on PC2 is from a local colony that were genotyped on plates 2 (dark blue), 7 (brown),

132 and 11 (orange). (B) 221 purebred cats color-coded by breed, showing the eastern-western breed  
133 distribution on PC1. The Devon Rex breed (dark green) separates on PC2.

134

## 135 **GWAS positive controls**

136 As a positive control, we performed a GWAS on the presence of orange fur in random bred  
137 cats (90 orange fur, 121 black/brown fur). Using the linear mixed model in GEMMA, we identified  
138 25 significant associations on a region of chromosome X between 102,884,842 bp and 112,136,902  
139 bp (Fig. 2A; S1 Table). The most significantly associated SNP in both the LMM and FarmCPU  
140 GWAS is at 110,230,748 bp ( $P=1.8\times 10^{-102}$  and  $P=2.2\times 10^{-97}$ , respectively), located within an intron  
141 in the gene *Ecto-NOX Disulfide-Thiol Exchanger 2 (ENOX2)*. This region is known to contain the  
142 *Orange* cat coloration locus [16–18] and the most significant SNP is within the 1.5 Mb haplotype  
143 block identified by Gandolfi *et al.* (2018). A linkage disequilibrium (LD) plot of this region  
144 showed that the 340k array has very few markers between 105-110 Mb on chromosome X, and  
145 only 4 markers within the 1.5 Mb haplotype block remain after minor allele frequency (MAF) and  
146 missingness filters, preventing the refinement of this region (S1A Fig.).

147

148 **Figure 2. Manhattan and quantile-quantile (QQ) plots for GWAS positive controls.** X axis  
149 represents the chromosomal SNP position and Y axis represents the  $-\log_{10}(P\text{-value})$ . The QQ plots  
150 show observed versus expected  $P$ -values for each SNP. (A) *Orange* coat color locus, showing the  
151 significant association on chromosome X ( $P=1.8\times 10^{-102}$ ). (B) Factor XII deficiency, showing the  
152 significant associations on chromosomes A1 and C2. The red line on the Manhattan plots shows  
153 the Bonferroni-corrected significance threshold and the blue line on the Manhattan plot in B shows

154 the Bonferroni-corrected significance threshold calculated using unlinked SNPs. The genomic  
155 inflation factor ( $\lambda$ ) is shown on each QQ plot.

156

157 As a second positive disease control, we performed a GWAS for factor XII deficiency, using 19  
158 affecteds and 34 controls. The LMM in GEMMA identified four significant associations on  
159 chromosome A1, between 175,333,103 bp and 175,445,463 bp, which reside within 63 kb of the  
160 gene *Coagulation Factor XII (F12)* (Fig. 2B, S1B Fig.). The most significant association using the  
161 FarmCPU method was the same A1 association at 175,445,463 bp ( $P=1.4\times 10^{-19}$ ). Two high-  
162 frequency variants in the gene *F12* have previously been reported in cats with factor XII deficiency  
163 [19]. Other significant associations were also identified in the factor XII GWAS by both models,  
164 on chromosomes C2, C1, D2, F1 and D3.

165

## 166 **Disease GWAS**

167 Across-breed case/control GWAS was conducted for the diseases HCM, hyperthyroidism,  
168 DM, CKD, chronic enteropathy, IBD, SCAL, FEK, hypercalcemia, and all gastrointestinal  
169 phenotypes (chronic enteropathy, IBD, and SCAL) merged together. Significance thresholds were  
170 calculated using the Bonferroni correction on all SNPs included in each GWAS, while suggestive  
171 thresholds were calculated using the Bonferroni correction on a pruned set of unlinked SNPs.

172

173 Three significant and two suggestive associations were identified above the genome-wide  
174 thresholds by the LMM GWAS in GEMMA (Table 1). The FarmCPU GWAS showed very similar  
175 results to the LMM GWAS, with significant associations for DM and hyperthyroidism (Table 1;  
176 S2 Table). However, the FEK association was not significant in the FarmCPU GWAS while the



177 IBD association was significant (Table 1; S2 Table). Since the results from the two methods were  
 178 so similar, we have chosen to focus illustrating the results of the LMM GWAS. Genomic inflation  
 179 factors,  $\lambda$ , are all  $<1.07$  (range of 0.997-1.052, average 1.016 for LMM; range of 1.013-1.062,  
 180 average 1.033 for FarmCPU), showing successful control for underlying population structure.

181  
 182 **Table 1: Significant and suggestive associations identified for complex diseases using an**  
 183 **across-breed GWAS design. Results are shown for both the LMM and FarmCPU GWAS.**

| <b>Disease</b><br>(number cases,<br>number controls) | <b>GWAS</b><br><b>model</b> | <b>Chr: bp</b>  | <b>P-value</b>          | <b>Allele frequency</b><br>(cases, controls) | <b>Candidate genes</b> |
|------------------------------------------------------|-----------------------------|-----------------|-------------------------|----------------------------------------------|------------------------|
| <b>Hyperthyroidism</b><br>(310, 134)                 | LMM                         | B2: 121,565,607 | $1.25 \times 10^{-7}$   | 0.037, 0.127                                 | <i>ARG1, MED23</i>     |
|                                                      | FarmCPU                     | B2: 121,565,607 | $1.36 \times 10^{-7}$   |                                              |                        |
| <b>DM</b><br>(67, 366)                               | LMM                         | D4: 83,583,678  | $1.62 \times 10^{-7}$   | 0.366, 0.172                                 | olfactory receptors,   |
|                                                      | FarmCPU                     | D4: 83,583,678  | $2.55 \times 10^{-7}$   |                                              | <i>PTGS1</i>           |
| <b>FEK</b><br>(15, 40)                               | LMM                         | E3: 34,663,327  | $1.62 \times 10^{-7}$   | 0.100, 0.638                                 | <i>TNFRSF17</i>        |
|                                                      | FarmCPU                     | E3: 34,663,327  | $1.79 \times 10^{-6}$ # |                                              |                        |
| <b>IBD</b><br>(47, 33)                               | LMM                         | B4: 10,941,073  | $2.75 \times 10^{-6}$ # | 0.216, 0.533                                 | N/A                    |
|                                                      | FarmCPU                     | B4: 10,941,073  | $9.54 \times 10^{-8}$   |                                              |                        |
| <b>HCM</b><br>(85, 53)                               | LMM                         | E3: 3,583,882   | $2.76 \times 10^{-7}$ ^ | 0.295, 0.604                                 | <i>SDKI</i>            |
|                                                      | FarmCPU                     | E3: 3,583,882   | $1.00 \times 10^{-6}$ # |                                              |                        |
| <b>Hypercalcemia</b>                                 | LMM                         | C1: 19,508,050  | $6.81 \times 10^{-7}$ ^ | 0.300, 0.085                                 | N/A                    |

---

(25, 443) FarmCPU C1: 19,508,050  $3.05 \times 10^{-7}^{\wedge}$

---

184 <sup>^</sup> suggestive association based on unlinked SNPs

185 # not significant

186

187 **Hyperthyroidism.** For hyperthyroidism, we found a solitary significant association on  
188 chromosome B2 ( $P=1.25 \times 10^{-7}$  in LMM,  $P=1.36 \times 10^{-7}$  in FarmCPU), located in the gene *Arginase*  
189 *1 (ARG1)* and 5.5 kb downstream of, although not in LD with, the gene *Mediator Complex Subunit*  
190 *23 (MED23)* (Fig. 3A). The B2 locus increases hyperthyroidism risk in DSH cats (S3 Table).

191

192 **Figure 3. Manhattan, quantile-quantile (QQ), and LD plots for case-control disease**  
193 **significant associations, using the LMM GWAS results.** X axis represents the chromosomal  
194 SNP position and Y axis represents the  $-\log_{10}(P\text{-value})$ . The QQ plots show observed versus  
195 expected  $P$ -values for each SNP. (A) Hyperthyroidism, showing the significant association on chr  
196 B2. (B) DM, showing the significant association on chr D4. (C) FEK, showing the significant  
197 association on chr E3. On Manhattan plots, the red line is Bonferroni-corrected significance  
198 threshold, and the blue line is Bonferroni-corrected significance threshold calculated using  
199 unlinked SNPs. Inflation factors ( $\lambda$ ) are shown on QQ plots. On LD plots, the colors indicate the  
200 amount of LD ( $r^2$ ) with the most significant SNP, ranging from black ( $r^2 < 0.2$ ) to red ( $r^2 > 0.8$ ).

201

202 **Diabetes mellitus.** Diabetes mellitus was significantly associated with a SNP on chromosome  
203 D4 ( $P=1.62 \times 10^{-7}$  in LMM,  $P=2.55 \times 10^{-7}$  in FarmCPU) (Fig. 3B). The LD region includes many  
204 members of the olfactory receptor gene family, such as *OR1J*, *OR1N*, *OR1K*, and *OR5C*, among  
205 other genes. The gene *PTGSI*, (*prostaglandin synthase G/H isoform 1*), also known as *COX1*

206 (*cyclooxygenase-1*), is located within 123 kb downstream of, although not in LD with, our  
207 significant association. This locus on D4 affects the risk of DM in DSH and Maine Coon cats, but  
208 not in cats of other breeds and DLH cats (S3 Table).

209

210 **Feline eosinophilic keratoconjunctivitis.** We identified a significant association for FEK  
211 ( $P=1.62\times 10^{-7}$ ) in the LMM GWAS, with a marker on chromosome E3, located 10.5 kb from the  
212 gene *TNFRSF17* (*tumor necrosis factor receptor superfamily, member 17*) (Fig. 3C). The second  
213 most significant association with this disease did not reach significance ( $P=3.1\times 10^{-6}$ ) but is located  
214 within the gene *TNFRSF21* (*tumor necrosis factor superfamily, member 21*). Both *TNFRSF17* and  
215 *TNFRSF21* belong to the tumor necrosis factor receptor superfamily, and *TNFRSF21* is expressed  
216 in the eye [24]. The E3 locus affects the risk for FEK in DSH cats (S3 Table).

217

218 **IBD.** A significant association ( $P=9.54\times 10^{-8}$ ) for IBD was identified using the FarmCPU GWAS.  
219 The marker is on chromosome B4 near the genes *ECHDC3* (*enoyl-CoA hydratase domain*  
220 *containing 3*) and *USP6NL* (*ubiquitin-specific protease 6 N-terminal like*) (S2 Fig.). *ECHDC3* has  
221 a role in fatty acid biosynthesis and has been found to have an increased expression in the brains  
222 of Alzheimer's patients [25] while *USP6NL* is a GTPase-activating protein for Rabs and is up-  
223 regulated in several cancers, including breast and colorectal cancers [26,27]. The B4 significant  
224 locus affects risk for IBD in DSH and DLH cats (S3 Table).

225

226 **HCM.** The LMM GWAS for HCM reached suggestive significance ( $P=2.76\times 10^{-7}$ ) with a marker  
227 on chromosome E3, located within the gene *SDK1* (*sidekick cell adhesion molecule 1*) (Fig. 4A),

228 which is expressed especially in the kidney and retina [28,29] but has also been associated with  
229 hypertension [30]. This suggestive E3 locus affects risk for HCM in DSH cats (S3 Table).

230

231 **Figure 4. Manhattan, quantile-quantile (QQ), and LD plots for case-control disease**  
232 **suggestive associations, using the LMM GWAS results.** X axis represents the chromosomal  
233 SNP position and Y axis represents the  $-\log_{10}(P\text{-value})$ . The QQ plots show observed versus  
234 expected  $P$ -values for each SNP. (A) HCM, showing the suggestive association on chr E3. (B)  
235 Hypercalcemia, showing the suggestive association on chr C1. On Manhattan plots, the red line is  
236 Bonferroni-corrected significance threshold, and the blue line is Bonferroni-corrected significance  
237 threshold calculated using unlinked SNPs. Inflation factors ( $\lambda$ ) are shown on QQ plots. On LD  
238 plots, the colors indicate the amount of LD ( $r^2$ ) with the most significant SNP, ranging from black  
239 ( $r^2 < 0.2$ ) to red ( $r^2 > 0.8$ ).

240

241 **Hypercalcemia.** The hypercalcemia GWAS produced a suggestive association ( $P=6.81 \times 10^{-7}$  in  
242 LMM,  $P=3.05 \times 10^{-7}$  in FarmCPU) on chromosome C1, located in the gene *PAFAH2* (*Platelet*  
243 *Activating Factor Acetylhydrolase 2*) and within LD of the gene *STMN1* (*Stathmin 1*) (Fig. 4B).  
244 The enzyme encoded by *PAFAH2* acts to protect the cell from oxidative cytotoxicity [31], while  
245 the protein encoded by *STMN1* is involved in regulating the microtubule cytoskeleton, including  
246 mitotic spindle formation [32]. The C1 locus affects risk for hypercalcemia in DSH cats (S3 Table).

247

248 Genome-wide association studies of the other complex diseases, CKD, SCAL, chronic  
249 enteropathy, and merged GI phenotypes did not produce a significant or suggestive association  
250 using either the LMM or FarmCPU GWAS (S3 Fig., S2 Table, S4 Table).

251

## 252 **Discussion**

253           In this study, we identified significant associations for common, clinically relevant,  
254 complex diseases in a population of 1,122 random and purebred cats, using a dense genotyping  
255 array. While a similar study was previously performed in dogs [33], this is the largest GWAS  
256 disease study in cats reported to date, conducted in a heterogeneous natural population including  
257 80% random bred cats. Further advantages of the current study design were the careful  
258 phenotyping of aged control cats, accurate phenotyping of diseased participants by specialists  
259 performed in an academic clinical setting, and a mapping array approximately 5-fold denser than  
260 the current 63k array. Additionally, the quality of the biospecimens used and its associated data  
261 demonstrate the importance of using an accredited resource such as the Cornell Veterinary  
262 Biobank.

263

264 As a positive control, we identified significant associations for the *Orange* coat color locus and  
265 factor XII deficiency at the *F12* gene locus. Although the *F12* locus was the most significant  
266 association using both LMM and FarmCPU models, three and five other significant SNPs were  
267 identified in the factor XII deficiency GWAS, respectively. A BLAT [34] search showed that the  
268 flanking region of the three SNP maps to many places in the feline genome, including chromosome  
269 A1: 175 Mb, the location of the gene *F12*. Thus, it appears that there may be some non-specific  
270 binding with the A1 probe. However, factor XII deficiency is affected by several different loci  
271 across the genome, as shown in humans [35].

272

273 The majority of the cats included in our analyses are random bred cats, which generally have  
274 shorter LD than purebreds [3], because they have not been subject to selective breeding for specific  
275 traits. Further, we are mapping complex diseases, which usually consist of many variants each  
276 contributing a small effect, and have not been subjected to artificial selection, resulting in shorter  
277 LD surrounding the causal variant. As a result of investigating complex diseases in a  
278 predominantly random bred cat population, we do not expect to see the stacking of SNPs that are  
279 seen in GWAS studies of morphological traits, especially in purebred cats.

280

281 Using a case/control approach, we performed GWAS with both a LMM and FarmCPU, and found  
282 very similar results. Both methods identified significant associations for hyperthyroidism and DM,  
283 and the FEK association was significant in the LMM GWAS while the IBD association was  
284 significant in the FarmCPU GWAS. Furthermore, the same SNPs were identified as the most  
285 significant associations by both models.

286

287 For hyperthyroidism, the candidate gene *ARG1* encodes Arginase 1, a cytosolic enzyme that  
288 participates in the urea cycle and is expressed in the liver [36]. Another nearby candidate gene,  
289 *MED23*, encodes a component of the thyroid hormone receptor (TR) associated protein complex.  
290 As such, it interacts with, and facilitates, TR function. Variants in the TR have been associated  
291 with thyroid hormone resistance, for which the clinical presentation is very similar to  
292 thyrotoxicosis [37]. This is the first GWAS for feline hyperthyroidism reported and our finding  
293 represents a novel locus. Somatic variants in the *thyroid-stimulating hormone receptor (TSHR)*  
294 gene have been previously reported, but those variants were identified in DNA extracted from the  
295 affected thyroid glands of hyperthyroid cats [38].

296

297 The significant DM locus includes many olfactory receptor genes. Genetic and epigenetic  
298 variation, and the resulting functional changes, in olfactory receptors have been associated with  
299 taste, food intake, and satiety [39,40]. These differences may contribute to obesity risk and risk of  
300 DM. Mouse olfactory receptor gene *OLFR15* has been shown to be expressed in pancreatic beta-  
301 cells and to regulate the secretion of insulin [41]. The other interesting gene near our significant  
302 D4 association, although not quite within the LD region of interest, *PTGSI*, encodes an enzyme  
303 that converts arachinodate into prostaglandin, which is involved in glucose homeostasis [42]. This  
304 gene has been associated with human DM [43,44]. Our findings constitute a novel locus associated  
305 with DM. Previous studies have identified several loci associated with DM in Australian Burmese  
306 cats [15,45] and a polymorphism in *melanocortin receptor 4 (MCR4)* associated with DM in obese  
307 domestic shorthair cats [46].

308

309 For eosinophilic keratoconjunctivitis, we identified a significant association in the LMM GWAS  
310 near the gene *TNFRSF17*. This is especially promising, and warrants further investigation because  
311 of its role in the innate and adaptive immune response. In patients with allergic asthma, eosinophils  
312 infiltrate the bronchial wall and lumen, and the bronchial epithelium is often damaged [47]. These  
313 pathological findings are associated with aberrant T helper 2 (Th2) cell-mediated immune  
314 responses. Interleukin-5, which is produced by Th2 cells, and the chemokine eotaxin are key  
315 players for the proliferation, differentiation, activation and mobilization of eosinophils [48,49]. In  
316 knockout mice studies, NF-kappa-B, a transcription factor that is activated by the *TNFRSF17* and  
317 *TNFRSF21* genes, was found to play an important role in Th2 cell differentiation and is therefore  
318 required for induction of allergic airway inflammation [48,50]. Similar to knockout mice with

319 allergic asthma, it is possible that animals affected with FEK have an abnormal NF-kappa-B  
320 activation due to defective expression of *TNFRSF17* and *TNFRSF21* genes, as suggested by the  
321 current GWAS study.

322

323 The IBD significant association, as identified by the FarmCPU method only, was located near the  
324 genes *ECHDC3* and *USP6NL*. Neither of these genes are good candidates for a gastroenteropathy  
325 phenotype.

326

327 The first of the two suggestive associations, HCM, was located in the gene *SDK1*. A polymorphism  
328 in *SDK1* was found to be associated with hypertension in a study of over 5,000 Japanese  
329 individuals [30] but the function of this gene related to hypertension has not been described.

330 Finally, the LD region surrounding the suggestive association for hypercalcemia contained the  
331 genes *PAFAH2* and *STMN1*, neither of which have been associated with hypercalcemia previously.

332

333 Despite the use of a dense genotyping array, across-breed GWAS for CKD, SCAL, chronic  
334 enteropathy, and merged gastrointestinal phenotypes did not reach statistical genome-wide  
335 significance using either single-locus or multi-locus models. We believe that larger cohorts may  
336 be needed due to the genetic architecture of these diseases, especially chronic enteropathy for  
337 which we had fewer than 50 cases in the respective GWAS.

338

339 By not restricting our analyses to a single breed, we were able to include a relatively large sample  
340 size for some of our phenotypes, thereby increasing statistical power to identify significant loci. In



341 a study of this kind, especially if the majority of cats are randomly bred, LD is shorter, resulting  
342 in smaller regions of interest and narrowing the list of potential candidate genes.

343  
344 Nevertheless, for some other phenotypes, we had an unbalanced proportion of cases and controls.  
345 This is due to the fact that accumulation of samples takes a long time, in part because donating  
346 samples is an opt-in process in our hospital, and because of the difficulty of recruiting universal  
347 controls. It is an unanswered question how many samples are required for a robust across-breed,  
348 complex disease GWAS study in cats, but canine simulation studies indicate that 500-1000 cases  
349 and controls, plus a further increase in array marker density, would substantially increase loci  
350 discovery in dogs [33].

351  
352 Follow-up analyses using an independent cohort of phenotyped cats are needed to validate the  
353 associations we identified in this group of genotyped cats. Further studies involving investigation  
354 of the regions surrounding the significant associations are needed to determine causal variants for  
355 these complex diseases. Use of the >300 whole genome sequences provided by the 99Lives Feline  
356 Genome Consortium will allow variant discovery within candidate genes in the intervals of  
357 interest. Finally, functional studies will be required to confirm causal variants.

358  
359 In this research, we used an across-breed GWAS design with a ~5-fold denser genotyping array  
360 than currently available, to identify significant associations with important common feline  
361 complex diseases. We demonstrated that a well-curated, hospital-sourced population can be used  
362 effectively for mapping studies. We also demonstrated the benefit of such a dense mapping array,  
363 propelling the field of complex feline disease genetics forward. Further, these results can be used

364 to develop new diagnostic tests to assist veterinarians in identifying diseases earlier and allowing  
365 the implementation of early preventative measures. Breeders could improve their practices by  
366 identifying cats with optimum genetic value and owners could make informed decisions regarding  
367 the health of cats. This is particularly important in this era of personalized medicine. The shared  
368 environment of cats and their owners further enhances the value of domestic cats as models of  
369 lifestyle disease common to both species.

370

## 371 **Materials and methods**

### 372 **Banking biospecimens and associated data**

373 The 1,122 feline biospecimens used for this project were selected from the Cornell  
374 Veterinary Biobank (CVB), a core resource at the Cornell University College of Veterinary  
375 Medicine, which has been collecting and processing whole blood samples from feline patients  
376 admitted to the Cornell University Hospital for Animals (CUHA) since 2006. Biospecimens from  
377 participants consented at our satellite clinic, the Cornell University Veterinary Specialist in  
378 Stamford, Connecticut, were also included.

379

380 Out of the 1,122 cats, 57 were recruited through the Senior Feline Health Screening program from  
381 2014 to 2018. The program was created to build a biobank of DNA and associated clinical data  
382 from healthy senior cats to serve as universal controls for mapping studies. In order to participate,  
383 feline candidates had to be at least 9.5 years of age and in good health. Privately owned cats that  
384 participated in the screening had a general physical examination and were examined accordingly  
385 by board certified specialists: cardiac auscultation and echocardiogram, dental examination, body

386 condition scoring, body mapping (used by oncologists to record any masses found), ocular  
387 examination, and an orthopedic examination. A complete blood count, serum chemistry panel,  
388 coagulation panel, feline immunodeficiency virus (FIV) and feline leukemia virus (FeLV) test,  
389 baseline serum thyroxine (T4) level, and urinalysis were performed.

390

## 391 **Sample Processing, Storage and Distribution**

392 Samples were collected according to the Cornell University Institutional Animal Care and  
393 Use Committee (IACUC) protocol #2005-0151. Following owner informed consent, whole blood  
394 samples were collected in EDTA tubes and refrigerated at 4°C until DNA extraction. Formalin  
395 fixed, paraffin embedded (FFPE) scrolls of splenic tissue were acquired from a collaborating  
396 pathologist and used for DNA extraction when necessary. Genomic DNA was extracted from  
397 blood samples using a standard salt precipitation. Genomic DNA was extracted from FFPE  
398 samples using the E.Z.N.A. Tissue DNA kit (Omega Bio-Tek) following the manufacturer's  
399 instructions. DNA concentration and purity were determined by spectrophotometry on a  
400 NanoDrop ND1000 (Thermo Scientific). DNA samples were stored at  $\leq -20^{\circ}\text{C}$  until distribution  
401 for genotyping.

402

## 403 **Inclusion criteria**

404 Participants with a disease of interest could simultaneously be used as controls for other  
405 traits/diseases, as long as these traits were ruled out. Phenotypes included cases and controls from  
406 any breed, unless specified. Controls were at least 9.5 years of age, while cases could be of any  
407 age. Numbers of purebred and random bred cats included as cases and controls for each GWAS

408 are shown in Table 2 and numbers of individuals from each breed are shown in S5 Table. The  
409 distribution of cases and controls by age is shown for each phenotype in S4 Fig.

410

411 **Table 2: Distribution of cases and controls that are purebred and random bred cats for each**  
412 **disease.**

| <b>Disease</b>             | <b>PUREBRED</b>             | <b>RANDOM BRED<sup>^</sup></b> | <b>Total number</b>    |
|----------------------------|-----------------------------|--------------------------------|------------------------|
|                            | <b>Number cases, number</b> | <b>Number cases,</b>           | <b>cases, controls</b> |
|                            | <b>controls</b>             | <b>number controls</b>         |                        |
| <b>HCM</b>                 | 14, 20                      | 69, 33                         | 83, 53                 |
| <b>Hyperthyroidism</b>     | 24, 38                      | 286, 96                        | 310, 134               |
| <b>DM</b>                  | 13, 62                      | 54, 304                        | 67, 366                |
| <b>CKD</b>                 | 29, 10                      | 125, 52                        | 154, 62                |
| <b>Chronic enteropathy</b> | 9, 10                       | 32, 18                         | 41, 28                 |
| <b>IBD</b>                 | 9, 15                       | 38, 18                         | 47, 33                 |
| <b>SCAL</b>                | 12, 16                      | 66, 18                         | 78, 34                 |
| <b>GI combined</b>         | 33, 16                      | 133, 18                        | 166, 34                |
| <b>FEK</b>                 | 2, 13                       | 13, 27                         | 15, 40                 |
| <b>Hypercalcemia</b>       | 5, 78                       | 20, 365                        | 25, 443                |

413 <sup>^</sup> includes domestic shorthair (DSH), domestic longhair (DLH), domestic medium hair (DMH), as  
414 well as cats identified as breed mixes (e.g., Siamese mix)

415

416 **Hypertrophic cardiomyopathy.** HCM is the most common cardiac disease in cats, affecting  
417 around 15% of the feline population [51,52]. Similarly to humans, familial HCM has been  
418 described in purebred cats, and in Maine coon and Ragdolls is caused by mutations in myosin  
419 binding protein C gene (MYBPC3) [53]. Some Maine coon and Ragdolls cats develop HCM in  
420 the absence of this mutation, indicating that other mutations are yet to be identified [53]. Diagnosis  
421 was based on echocardiography. Phenotypic criteria for controls included normal left ventricular  
422 wall thickness measurements: left ventricular free wall (LVFW) and interventricular septum (IVS)  
423 in diastole  $\leq 6$  mm by M-mode (motion mode). Phenotypic criteria for cases included LVFW and  
424 IVS wall thickness  $>6$  mm. Additionally, affected cats must have had normal baseline T4 and be  
425 normotensive and normally hydrated in order to rule out other causes of cardiac hypertrophy.

426

427 **Hyperthyroidism.** Hyperthyroidism is one of the most common endocrine disorders affecting  
428 senior cats. The disease most often results from benign adenomatous thyroid nodules similar to  
429 human toxic nodular goiter [54]. Hyperthyroidism is believed to be a multifactorial disease, with  
430 nutritional, environmental, and genetic factors postulated as interacting causes [54]. The diagnosis  
431 of cases and controls was based on the following criteria: control cats had low-normal thyroxine  
432 (T4;  $<3$   $\mu$ g/dL; normal range 2-5  $\mu$ g/dL). Cases had T4  $>5$   $\mu$ g/dL or normal T4 with increased  
433 free T4. Radioiodinated thyroid scan results confirming the diagnosis were recorded, if available.

434

435 **Diabetes mellitus.** DM is also one of the most common endocrine diseases of cats with the  
436 majority of the cats resembling Type 2 (adult onset) DM in humans. The disease is caused by a  
437 combination of decreased  $\beta$ -cell function, insulin resistance, and environmental and genetic factors  
438 [55]. Diagnosis of DM was based on the following criteria: control cats had blood glucose values

439 <200 mg/dL (reference values: 71-182 mg/dL) and no glucosuria. Cases had elevated blood  
440 glucose (>250 mg/dL) and glucosuria in at least two consecutive visits. Also, fructosamine, if  
441 evaluated, had to be above normal range (174-294  $\mu$ mol/L). Of the 67 cases in the GWAS, 39 had  
442 fructosamine tests and all had elevated levels. Fifty-three diabetic cases and 339 controls had body  
443 weight recorded. Although the body weights of cases were spread throughout the range of 1.8kg  
444 to 10kg, a greater proportion of cases (12 of 53, or 22.6%) had weights >7kg, compared to controls  
445 (17 of 339, or 5.0%) (S5 Fig).

446

447 **Chronic kidney disease.** CKD is highly prevalent in both humans and cats with  
448 approximately 10% of cats >10 years of age reported to be affected. Cats with CKD experience a  
449 progressive loss of functional renal mass. CKD is considered a heterogeneous syndrome, rather  
450 than a single entity [56]. CKD was diagnosed by evaluating the level of blood urea nitrogen (BUN)  
451 and creatinine, in conjunction with the urine specific gravity (USG). Symmetric dimethylarginine  
452 (SDMA), a natural occurring indicator for kidney function, was measured in the blood of some  
453 cases to determine if early renal disease was occurring. The diagnosis was established according  
454 to the following criteria: controls cats had creatinine <1.6 mg/dL (normal range 0.6-2 mg/dL),  
455 BUN within normal range (16-36 mg/dL) and USG >1.035 (preferably performed on the same day  
456 as creatinine was measured). Cases had to be azotemic (elevated BUN and creatinine values) with  
457 concurrent isosthenuria (failure of the kidney to dilute or concentrate urine) and increased SDMA,  
458 diagnosed by a board-certified veterinary internist.

459

460 **Chronic enteropathy/inflammatory bowel disease/small cell alimentary**  
461 **lymphoma.** Chronic enteropathies, which include Inflammatory Bowel Disease (IBD) and

462 Small Cell Alimentary Lymphoma (SCAL), are common forms of primary gastrointestinal disease  
463 in cats. Although the cause of feline IBD is unknown, it has been hypothesized that, similar to  
464 canines and humans, feline IBD is caused by several factors such as intestinal microbial  
465 imbalances, diet, and defects in the mucosal immune system [57]. SCAL is the most frequent  
466 digestive neoplasia in cats, accounting for 60-75% of gastrointestinal lymphoma cases [58].

467

468 For this study, cats were assigned as chronic enteropathy cases if gastrointestinal (GI) clinical signs  
469 such as chronic vomiting, diarrhea, or weight loss were present, non-GI causes of their clinical  
470 signs were excluded, thus highly suggestive of either IBD or SCAL, but no histologic diagnosis  
471 was performed. IBD and SCAL were considered separate diagnoses that required histological  
472 confirmation. Distinguishing between IBD and SCAL can be difficult, so in addition to histologic  
473 assessment, immunophenotyping and polymerase chain reaction (PCR) for antigen receptor  
474 rearrangements (PARR) were used in some cases to confirm the SCAL diagnosis. Phenotypic  
475 criteria for affected cats included persistent clinical GI signs and histopathology performed by a  
476 board-certified veterinary pathologist confirming either IBD or SCAL. Control cats were  
477 examined by a board-certified oncologist and had an absence of any GI signs. We performed a  
478 separate GWAS for each of IBD and SCAL, and then chronic enteropathy, which includes cats  
479 that were not formally diagnosed but could be either IBD or SCAL. Finally, we performed a  
480 GWAS including all GI cases in an attempt to increase statistical power, and since IBD, SCAL,  
481 and chronic enteropathy can be considered a different manifestation of the same disorder [59].  
482 There is also evidence that IBD leads to SCAL [60].

483

484 **Feline eosinophilic keratoconjunctivitis.** FEK is a corneal/conjunctival disease  
485 characterized by vascularized white-to-pink plaques on the cornea and bulbar conjunctiva. In the  
486 majority of cats, previous corneal ulceration has been diagnosed and an association with feline  
487 herpesvirus type 1 (FHV-1) infection has been proposed [61]. The diagnosis of FEK was made  
488 according to the following criteria: affected cats had signs of the disease during ophthalmologic  
489 exam performed by a board-certified veterinary ophthalmologist, including proliferative  
490 vascularized lesions affecting peripheral corneal/bulbar conjunctiva and the presence of  
491 eosinophils in the ocular cytology. Control cats had a normal ophthalmologic exam.

492

493 **Hypercalcemia.** Hypercalcemia is a common condition of cats defined by an increase in both  
494 total and ionized serum calcium. It may be caused by many conditions such as neoplasia, renal  
495 failure, primary hyperparathyroidism, hypoadrenocorticism, ingestion of cholecalciferol-  
496 containing rodenticides, or granulomatous disease. In cats, hypercalcemia can also be idiopathic  
497 [62], which is the phenotype we are investigating here. The diagnosis of hypercalcemia was  
498 determined as follows: control cats had total serum calcium values within the normal range (9.1-  
499 10.9 mg/dL); affected cats had elevated total serum calcium and ionized calcium values (reference  
500 interval 1.11-1.38 mmol/L). Parathyroid hormone (PTH) and PTH related peptide (PTHrP) were  
501 recorded if available, and were used to differentiate between causes of hypercalcemia.

502

## 503 **Design of array**

504 Genotyping was performed on an Illumina Infinium iSelect Custom BeadChip. These  
505 arrays contain 340,000 attempted beadtypes for genotyping single nucleotide polymorphisms



506 selected across the entire cat genome, using feline genome assembly felCat5. Of the 340,000  
507 markers included on the array, 297,034 (87%) provided a reliable call.

508

509 SNPs for the array were selected from whole genome sequencing of 6 genetically diverse female  
510 DSH cats. These 6 cats were sequenced on a HiSeq2500 (Illumina, San Diego, CA) to generate  
511 100bp paired-end reads. Following GATK best practices pipeline [63], reads were mapped to the  
512 feline reference genome using BWA mem [64], then duplicate reads were tagged by PICARD  
513 MarkDuplicates, and indels were realigned and quality scores were recalibrated using GATK.  
514 Variants were called and filtered using GATK HaplotypeCaller and VCFtools [65]. The full list of  
515 variants was thinned randomly using PLINK and then protein-coding variants with moderate and  
516 high impact as defined by SnpEff [66] were added back in.

517

## 518 **Genotyping**

519 In total, 1,200 feline DNA samples were genotyped on the Hill's custom Illumina feline  
520 high density mapping array. Genotyping was performed in 11 batches, or plates, by Neogen  
521 GeneSeek Operations (Lincoln, NE). Raw data files were converted to PLINK format and quality  
522 control was performed in PLINK v1.9 ([www.cog-genomics.org/plink/1.0/](http://www.cog-genomics.org/plink/1.0/)) [67,68].

523

## 524 **Quality control**

525 Genotyping data from the 11 batches were merged together using PLINK's --bmerge  
526 command and a sex check of all samples was performed using PLINK's --check-sex command.  
527 Seventy samples were removed due to missingness >80%, including 53 samples from the same  
528 batch.

529

530 SNPs were converted to the genome assembly felCat9 [69] and SNPs with missingness >95% in  
531 the 1,130 cats were removed, leaving 252,987 SNPs. Eight cats were genotyped on two different  
532 plates each as internal controls. The SNPs that were discordant between these eight duplicates  
533 were identified and removed. Finally, duplicate samples were removed, leaving a dataset of 1,122  
534 individuals and 251,978 SNPs for GWAS.

535

536 A Principal Component Analysis (PCA) was performed using the program EIGENSTRAT in the  
537 EIGENSOFT package [70]. For this, linked SNPs were pruned using PLINK's --indep 50 5 2  
538 command, leaving 91,556 SNPs. PCA was performed using all cats to look for batch effects, and  
539 all purebred cats to ensure individuals of the same breed clustered together. PCA was also  
540 performed using only the cats included in each phenotype to identify and remove outliers before  
541 GWAS analysis. An outlier is an individual that is located separately from the main cluster of cats  
542 on either the PC1 or PC2 axis. Further, in order to reduce the effects of genetically distinct  
543 individuals in our GWAS, we also removed any purebred cat that was located separately from the  
544 main cluster of random bred individuals on either PC1 or PC2.

545

546 For the DM and HCM phenotypes, a further two and 16 cats, respectively, were genotyped on the  
547 same 340k custom Illumina array by external coauthors (MEW and JAB, respectively). For these  
548 cats, the genotype files were merged with the sample set before the QC was performed, as  
549 described above. The genotype and phenotype data for all three of these datasets are available as  
550 PLINK files, and include the SNP information (chromosome, bp location, alleles).

551

## 552 **Genome-wide association study**

553 Both a single-locus linear mixed model (LMM) and a multi-locus model were used to  
554 perform a GWAS for each disease phenotype. The LMM was performed in the program GEMMA  
555 v 0.98.1 [71], which includes a relatedness matrix as a random effect. The multi-locus method  
556 performed was FarmCPU (Fixed and random model Circulating Probability Unification) [72] run  
557 using rMVP [73] in R. FarmCPU is designed to help control for false positives by including  
558 associated markers as covariates, while also reducing false negatives by removing the confounding  
559 between the population structure and kinship and the markers to be tested. We used the default  
560 parameters, with a maximum of 10 iterations. For each phenotype, we included the relatedness  
561 matrix calculated by GEMMA and a covariate file consisting of the first four PCs from a PCA run  
562 on the genotypes of the cats included in the phenotype only.

563  
564 For both models, the Wald test was used to calculate  $P$ -values, and the Bonferroni correction  
565 ( $p_{\text{genome}}=0.05$ ) was used to calculate the genome-wide significance threshold. A suggestive  
566 threshold was calculated using the Bonferroni correction on unlinked SNPs (pruned using the --  
567 indep 50 5 2 option in PLINK).

568  
569 For each phenotype, PCA outliers and related cats ( $p_{\text{ihat}}>0.40$ ) were excluded. Single nucleotide  
570 polymorphisms with a minor allele frequency (MAF)  $<5\%$  and a genotyping call rate  $<90\%$  were  
571 removed from each analysis. SNPs are provided in genome assembly felCat9.

572

573 Manhattan and quantile-quantile (QQ) plots were created using the package qqman [74] in R  
574 v4.0.2 [75]. Lambda values, as a quantification for genomic inflation, were calculated in R.  
575 Linkage disequilibrium plots were created using matplolib [76] in jupyter notebook [77].

576

## 577 **GWAS positive controls**

578 As a positive control for the 340k array, we performed GWAS on the presence of orange  
579 fur. The *Orange* locus has been refined to a 1.5Mb region on the X chromosome, although the  
580 causal variant is unknown [16–18]. We used 211 random bred cats in the orange GWAS: 90 cats  
581 that had a coat color description of orange (including solid orange, orange and white, and orange  
582 tabby), and 121 cats that had a coat color description of black, brown or brown tabby.

583

584 We also performed a positive control GWAS of factor XII deficiency, a common hereditary  
585 coagulation factor deficiency in cats that does not cause a bleeding diathesis. For this phenotype,  
586 affected cats were classified based on severe factor XII deficiency (factor XII coagulant activity <  
587 10% of normal), whereas control cats had values above 60%. Nineteen affected cats and 34  
588 controls were included in the GWAS.

589

## 590 **Acknowledgements**

591 We especially thank the faculty and staff of the Cornell University Hospital for Animals  
592 for sample collection and phenotyping of control cats. We would like to acknowledge Gregory  
593 Acland and John Schimenti for instigation of the Cornell Veterinary Biobank, and support from  
594 Baker Institute for Animal Health, Cornell University Center for Vertebrate Genomics, and

595 Department of Clinical Sciences. Finally, we thank numerous pet owners for donating their pets'  
596 samples, and collaborators for sample collection and phenotyping.

597

## 598 **References**

- 599 1. AVMA Pet Ownership and Demographics Sourcebook. 2017-2018 edition. Schaumburg,IL:  
600 American Veterinary Medical Association, 2018.
- 601 2. Driscoll CA, Clutton-Brock J, Kitchener AC, O'Brien SJ. The Taming of the cat. Genetic  
602 and archaeological findings hint that wildcats became housecats earlier--and in a different  
603 place--than previously thought. *Sci Am.* 2009;300: 68–75.
- 604 3. Alhaddad H, Khan R, Grahn RA, Gandolfi B, Mullikin JC, Cole SA, et al. Extent of  
605 Linkage Disequilibrium in the Domestic Cat, *Felis silvestris catus*, and Its Breeds. *PLoS*  
606 *ONE.* 2013;8. doi:10.1371/journal.pone.0053537
- 607 4. Takaichi Y, Chambers JK, Shiroma-Kohyama M, Haritani M, Une Y, Yamato O, et al.  
608 Feline Spongy Encephalopathy With a Mutation in the ASPA Gene. *Vet Pathol.* 2021;  
609 3009858211002176. doi:10.1177/03009858211002176
- 610 5. Li RHL, Ontiveros E, Nguyen N, Stern JA, Lee E, Hardy BT, et al. Precision medicine  
611 identifies a pathogenic variant of the ITGA2B gene responsible for Glanzmann's  
612 thrombasthenia in a cat. *J Vet Intern Med.* 2020;34: 2438–2446. doi:10.1111/jvim.15886
- 613 6. Lucia MD, Bauer A, Spycher M, Jagannathan V, Romano E, Welle M, et al. Genetic  
614 variant in the NSDHL gene in a cat with multiple congenital lesions resembling

- 615 inflammatory linear verrucous epidermal nevi. *Vet Dermatol.* 2019;30: 64-e18.  
616 doi:10.1111/vde.12699
- 617 7. Baker L, Muir P, Sample SJ. Genome-wide association studies and genetic testing:  
618 Understanding the science, success, and future of a rapidly developing field. *Journal of the*  
619 *American Veterinary Medical Association.* American Veterinary Medical Association;  
620 2019. pp. 1126–1136. doi:10.2460/javma.255.10.1126
- 621 8. Gandolfi B, Gruffydd-Jones TJ, Malik R, Cortes A, Jones BR, Helps CR, et al. First  
622 WNK4-Hypokalemia Animal Model Identified by Genome-Wide Association in Burmese  
623 Cats. *PLoS ONE.* 2012;7. doi:10.1371/journal.pone.0053173
- 624 9. Alhaddad H, Gandolfi B, Grahn RA, Rah HC, Peterson CB, Maggs DJ, et al. Genome-wide  
625 association and linkage analyses localize a progressive retinal atrophy locus in Persian cats.  
626 *Mamm Genome.* 2014;25: 354–362. doi:10.1007/s00335-014-9517-z
- 627 10. Gandolfi B, Grahn RA, Creighton EK, Williams DC, Dickinson PJ, Sturges BK, et al.  
628 COLQ variant associated with Devon Rex and Sphynx feline hereditary myopathy. *Anim*  
629 *Genet.* 2015;46: 711–715. doi:10.1111/age.12350
- 630 11. Lyons LA, Erdman CA, Grahn RA, Hamilton MJ, Carter MJ, Helps CR, et al. Aristaless-  
631 Like Homeobox protein 1 (ALX1) variant associated with craniofacial structure and  
632 frontonasal dysplasia in Burmese cats. *Dev Biol.* 2016;409: 451–458.  
633 doi:10.1016/j.ydbio.2015.11.015

- 634 12. Yu Y, Creighton EK, Buckley RM, Lyons LA. A deletion in GDF7 is associated with a  
635 heritable forebrain commissural malformation concurrent with ventriculomegaly and  
636 interhemispheric cysts in cats. *Genes*. 2020;11: 1–15. doi:10.3390/genes11060672
- 637 13. Gandolfi B, Alamri S, Darby WG, Adhikari B, Lattimer JC, Malik R, et al. A dominant  
638 TRPV4 variant underlies osteochondrodysplasia in Scottish fold cats. *Osteoarthritis  
639 Cartilage*. 2016;24: 1441–1450. doi:10.1016/j.joca.2016.03.019
- 640 14. Golovko L, Lyons LA, Liu H, Sørensen A, Wehnert S, Pedersen NC. Genetic susceptibility  
641 to feline infectious peritonitis in Birman cats. *Virus Res*. 2013;175: 58–63.  
642 doi:10.1016/j.virusres.2013.04.006
- 643 15. Samaha G, Wade CM, Beatty J, Lyons LA, Fleeman LM, Haase B. Mapping the genetic  
644 basis of diabetes mellitus in the Australian Burmese cat (*Felis catus*). *Sci Rep*. 2020;10.  
645 doi:10.1038/s41598-020-76166-3
- 646 16. Gandolfi B, Alhaddad H, Abdi M, Bach LH, Creighton EK, Davis BW, et al. Applications  
647 and efficiencies of the first cat 63K DNA array. *Sci Rep*. 2018;8. doi:10.1038/s41598-018-  
648 25438-0
- 649 17. Schmidt-Küntzel A, Nelson G, David VA, Schäffer AA, Eizirik E, Roelke ME, et al. A  
650 domestic cat X chromosome linkage map and the sex-linked orange locus: Mapping of  
651 orange, multiple origins and epistasis over nonagouti. *Genetics*. 2009;181: 1415–1425.  
652 doi:10.1534/genetics.108.095240

- 653 18. Grahn RA, Lemesch BM, Millon L V., Matisse T, Rogers QR, Morris JG, et al. Localizing  
654 the X-linked orange colour phenotype using feline resource families. *Anim Genet.* 2005;36:  
655 67–70. doi:10.1111/j.1365-2052.2005.01239.x
- 656 19. Maruyama H, Brooks MB, Stablein A, Frye A. Factor XII deficiency is common in  
657 domestic cats and associated with two high frequency F12 mutations. *Gene.* 2019;706: 6–  
658 12. doi:10.1016/j.gene.2019.04.053
- 659 20. O’Neill DG, Church DB, McGreevy PD, Thomson PC, Brodbelt DC. Prevalence of  
660 disorders recorded in cats attending primary-care veterinary practices in England. *Vet J.*  
661 2014;202: 286–291. doi:10.1016/j.tvjl.2014.08.004
- 662 21. Kurushima JD, Lipinski MJ, Gandolfi B, Froenicke L, Grahn JC, Grahn RA, et al. Variation  
663 of cats under domestication: Genetic assignment of domestic cats to breeds and worldwide  
664 random-bred populations. *Anim Genet.* 2013;44: 311–324. doi:10.1111/age.12008
- 665 22. Lipinski MJ, Froenicke L, Baysac KC, Billings NC, Leutenegger CM, Levy AM, et al. The  
666 ascent of cat breeds: Genetic evaluations of breeds and worldwide random-bred  
667 populations. *Genomics.* 2008;91: 12–21. doi:10.1016/j.ygeno.2007.10.009
- 668 23. Alhaddad H, Abdi M, Lyons LA. Patterns of allele frequency differences among domestic  
669 cat breeds assessed by a 63K SNP array. Barsh GS, editor. *PLOS ONE.* 2021;16:  
670 e0247092. doi:10.1371/journal.pone.0247092
- 671 24. Pan H, Wu S, Wang J, Zhu T, Li T, Wan B, et al. TNFRSF21 mutations cause high myopia.  
672 *J Med Genet.* 2019;56: 671–677. doi:10.1136/jmedgenet-2018-105684



- 673 25. Desikan RS, Schork AJ, Wang Y, Thompson WK, Dehghan A, Ridker PM, et al. Polygenic  
674 Overlap Between C-Reactive Protein, Plasma Lipids, and Alzheimer Disease. *Circulation*.  
675 2015;131: 2061–2069. doi:10.1161/CIRCULATIONAHA.115.015489
- 676 26. Sun K, He S-B, Yao Y-Z, Qu J-G, Xie R, Ma Y-Q, et al. Tre2 (USP6NL) promotes  
677 colorectal cancer cell proliferation via Wnt/ $\beta$ -catenin pathway. *Cancer Cell Int*. 2019;19:  
678 102. doi:10.1186/s12935-019-0823-0
- 679 27. Avanzato D, Pupo E, Ducano N, Isella C, Bertalot G, Luise C, et al. High USP6NL Levels  
680 in Breast Cancer Sustain Chronic AKT Phosphorylation and GLUT1 Stability Fueling  
681 Aerobic Glycolysis. *Cancer Res*. 2018;78: 3432–3444. doi:10.1158/0008-5472.CAN-17-  
682 3018
- 683 28. Yamagata M, Weiner JA, Sanes JR. Sidekicks: synaptic adhesion molecules that promote  
684 lamina-specific connectivity in the retina. *Cell*. 2002;110: 649–660. doi:10.1016/s0092-  
685 8674(02)00910-8
- 686 29. Kaufman L, Potla U, Coleman S, Dikiy S, Hata Y, Kurihara H, et al. Up-regulation of the  
687 homophilic adhesion molecule sidekick-1 in podocytes contributes to glomerulosclerosis. *J*  
688 *Biol Chem*. 2010;285: 25677–25685. doi:10.1074/jbc.M110.133959
- 689 30. Oguri M, Kato K, Yokoi K, Yoshida T, Watanabe S, Metoki N, et al. Assessment of a  
690 Polymorphism of SDK1 With Hypertension in Japanese Individuals. *Am J Hypertens*.  
691 2010;23: 70–77. doi:10.1038/ajh.2009.190

- 692 31. Tjoelker LW, Stafforini DM. Platelet-activating factor acetylhydrolases in health and  
693 disease. *Biochimica et Biophysica Acta - Molecular and Cell Biology of Lipids*. *Biochim*  
694 *Biophys Acta*; 2000. pp. 102–123. doi:10.1016/S1388-1981(00)00114-1
- 695 32. Rubin CI, Atweh GF. The role of stathmin in the regulation of the cell cycle. *J Cell*  
696 *Biochem*. 2004;93: 242–250. doi:10.1002/jcb.20187
- 697 33. Hayward JJ, Castelhana MG, Oliveira KC, Corey E, Balkman C, Baxter TL, et al. Complex  
698 disease and phenotype mapping in the domestic dog. *Nat Commun*. 2016;7.  
699 doi:10.1038/ncomms10460
- 700 34. Kent WJ. BLAT---The BLAST-Like Alignment Tool. *Genome Res*. 2002;12: 656–664.  
701 doi:10.1101/gr.229202
- 702 35. Soria JM, Almasy L, Souto JC, Bacq D, Buil A, Faure A, et al. A Quantitative-Trait Locus  
703 in the Human Factor XII Gene Influences Both Plasma Factor XII Levels and Susceptibility  
704 to Thrombotic Disease. *Am J Hum Genet*. 2002;70: 567–574.
- 705 36. You J, Chen W, Chen J, Zheng Q, Dong J, Zhu Y. The oncogenic role of ARG1 in  
706 progression and metastasis of hepatocellular carcinoma. *BioMed Res Int*. 2018;2018.  
707 doi:10.1155/2018/2109865
- 708 37. Olateju TO, Vanderpump MPJ. Thyroid hormone resistance. *Annals of Clinical*  
709 *Biochemistry*. *Ann Clin Biochem*; 2006. pp. 431–440. doi:10.1258/000456306778904678

- 710 38. Watson SG, Radford AD, Kipar A, Ibarrola P, Blackwood L. Somatic mutations of the  
711 thyroid-stimulating hormone receptor gene in feline hyperthyroidism: Parallels with human  
712 hyperthyroidism. *J Endocrinol.* 2005;186: 523–537. doi:10.1677/joe.1.06277
- 713 39. Precone V, Beccari T, Stuppia L, Baglivo M, Paolacci S, Manara E, et al. Taste, olfactory  
714 and texture related genes and food choices: Implications on health status. *Eur Rev Med*  
715 *Pharmacol Sci.* 2019;23: 1305–1321. doi:10.26355/eurrev\_201902\_17026
- 716 40. Ramos-Lopez O, Riezu-Boj JI, Milagro FI, Zulet MA, Santos JL, Martinez JA, et al.  
717 Associations between olfactory pathway gene methylation marks, obesity features and  
718 dietary intakes. *Genes Nutr.* 2019;14. doi:10.1186/s12263-019-0635-9
- 719 41. Munakata Y, Yamada T, Imai J, Takahashi K, Tsukita S, Shirai Y, et al. Olfactory receptors  
720 are expressed in pancreatic  $\beta$ -cells and promote glucose-stimulated insulin secretion. *Sci*  
721 *Rep.* 2018;8. doi:10.1038/s41598-018-19765-5
- 722 42. Robertson RP. Prostaglandins, glucose homeostasis, and diabetes mellitus. Annual review  
723 of medicine. *Annu Rev Med;* 1983. pp. 1–12. doi:10.1146/annurev.me.34.020183.000245
- 724 43. Attia HRM, Kamel SA, Ibrahim MH, Farouk HA, Rahman AHA, Sayed GH, et al. Open-  
725 array analysis of genetic variants in Egyptian patients with type 2 diabetes and obesity.  
726 *Egypt J Med Hum Genet.* 2017;18: 341–348. doi:10.1016/j.ejmhg.2017.03.002
- 727 44. Tang H, Wei P, Duell EJ, Risch HA, Olson SH, Bueno-De-Mesquita HB, et al. Genes-  
728 environment interactions in obesity- and diabetes-associated pancreatic cancer: A GWAS  
729 data analysis. *Cancer Epidemiol Biomarkers Prev.* 2014;23: 98–106. doi:10.1158/1055-  
730 9965.EPI-13-0437-T

- 731 45. Balmer L, O’leary CA, Menotti-Raymond M, David V, O’Brien S, Penglis B, et al.  
732 Mapping of diabetes susceptibility LOCI in a domestic cat breed with an unusually high  
733 incidence of diabetes mellitus. *Genes*. 2020;11: 1–11. doi:10.3390/genes11111369
- 734 46. Forcada Y, Holder A, Church DB, Catchpole B. A Polymorphism in the melanocortin 4  
735 receptor gene (MC4R: C.92C>T) is associated with diabetes mellitus in overweight  
736 domestic shorthaired cats. *J Vet Intern Med*. 2014;28: 458–464. doi:10.1111/jvim.12275
- 737 47. Holgate ST. Epithelial damage and response. *Clinical and Experimental Allergy*,  
738 Supplement. *Clin Exp Allergy*; 2000. pp. 37–41. doi:10.1046/j.1365-2222.2000.00095.x
- 739 48. Yang L, Cohn L, Zhang DH, Homer R, Ray A, Ray P. Essential role of nuclear factor  $\kappa$ B in  
740 the induction of eosinophilia in allergic airway inflammation. *J Exp Med*. 1998;188: 1739–  
741 1750. doi:10.1084/jem.188.9.1739
- 742 49. Collins PD, Marleau S, Griffiths-Johnson DA, Jose PJ, Williams TJ. Cooperation between  
743 interleukin-5 and the chemokine eotaxin to induce eosinophil accumulation in vivo. *J Exp*  
744 *Med*. 1995;182: 1169–1174. doi:10.1084/jem.182.4.1169
- 745 50. Das J, Chen CH, Yang L, Cohn L, Ray P, Ray A. A critical role for NF- $\kappa$ B in Gata3  
746 expression and TH2 differentiation in allergic airway inflammation. *Nat Immunol*. 2001;2:  
747 45–50. doi:10.1038/83158
- 748 51. Payne JR, Brodbelt DC, Luis Fuentes V. Cardiomyopathy prevalence in 780 apparently  
749 healthy cats in rehoming centres (the CatScan study). *J Vet Cardiol*. 2015;17: S244–S257.  
750 doi:10.1016/j.jvc.2015.03.008

- 751 52. Gil-Ortuño C, Sebastián-Marcos P, Sabater-Molina M, Nicolas-Rocamora E, Gimeno-  
752 Blanes JR, Fernández del Palacio MJ. Genetics of feline hypertrophic cardiomyopathy.  
753 Clinical Genetics. Blackwell Publishing Ltd; 2020. pp. 203–214. doi:10.1111/cge.13743
- 754 53. Côté E, MacDonald KA, Meurs KM, Sleeper MM. Hypertrophic Cardiomyopathy. In:  
755 Feline cardiology. Chichester, UK: John Wiley & Sons; 2011. pp. 103–75.
- 756 54. Peterson ME. Feline hyperthyroidism: An animal model for toxic nodular goiter. Journal of  
757 Endocrinology. BioScientifica Ltd.; 2014. pp. T97–T114. doi:10.1530/JOE-14-0461
- 758 55. O’Neill DG, Gostelow R, Orme C, Church DB, Niessen SJM, Verheyen K, et al.  
759 Epidemiology of Diabetes Mellitus among 193,435 Cats Attending Primary-Care  
760 Veterinary Practices in England. J Vet Intern Med. 2016;30: 964–972.  
761 doi:10.1111/jvim.14365
- 762 56. Finch NC, Syme HM, Elliott J. Risk Factors for Development of Chronic Kidney Disease in  
763 Cats. J Vet Intern Med. 2016;30: 602–610. doi:10.1111/jvim.13917
- 764 57. Jergens AE. Feline Idiopathic Inflammatory Bowel Disease: What we know and what  
765 remains to be unraveled. J Feline Med Surg. 2012;14: 445–458.  
766 doi:10.1177/1098612X12451548
- 767 58. Paulin M V., Couronné L, Beguin J, Le Poder S, Delverdier M, Semin MO, et al. Feline  
768 low-grade alimentary lymphoma: An emerging entity and a potential animal model for  
769 human disease. BMC Veterinary Research. BioMed Central Ltd.; 2018.  
770 doi:10.1186/s12917-018-1635-5

- 771 59. Marsilio S. Feline chronic enteropathy. *J Small Anim Pract.* 2021;62: 409–419.  
772 doi:10.1111/jsap.13332
- 773 60. Moore PF, Woo JC, Vernau W, Kosten S, Graham PS. Characterization of feline T cell  
774 receptor gamma (TCRG) variable region genes for the molecular diagnosis of feline  
775 intestinal T cell lymphoma. *Vet Immunol Immunopathol.* 2005;106: 167–178.  
776 doi:10.1016/j.vetimm.2005.02.014
- 777 61. Lucyshyn DR, Good KL, Knickelbein KE, Chang MW, Strøm AR, Hollingsworth SR, et al.  
778 Subcutaneous administration of triamcinolone as part of the management of feline  
779 eosinophilic keratoconjunctivitis. *J Feline Med Surg.* 2020.  
780 doi:10.1177/1098612X20968660
- 781 62. Midkiff AM, Chew DJ, Randolph JF, Center SA, DiBartola SP. Idiopathic Hypercalcemia  
782 in Cats. *J Vet Intern Med.* 2000;14: 619. doi:10.1892/0891-  
783 6640(2000)014<0619:ihic>2.3.co;2
- 784 63. Van der Auwera GA, Carneiro MO, Hartl C, Poplin R, del Angel G, Levy-Moonshine A, et  
785 al. From fastQ data to high-confidence variant calls: The genome analysis toolkit best  
786 practices pipeline. *Curr Protoc Bioinforma.* 2013;43. doi:10.1002/0471250953.bi1110s43
- 787 64. Li H, Durbin R. Fast and accurate short read alignment with Burrows-Wheeler transform.  
788 *Bioinformatics.* 2009;25: 1754–1760. doi:10.1093/bioinformatics/btp324
- 789 65. Danecek P, Auton A, Abecasis G, Albers CA, Banks E, DePristo MA, et al. The variant call  
790 format and VCFtools. *Bioinformatics.* 2011;27: 2156–2158.  
791 doi:10.1093/bioinformatics/btr330

- 792 66. Cingolani P, Platts A, Wang LL, Coon M, Nguyen T, Wang L, et al. A program for  
793 annotating and predicting the effects of single nucleotide polymorphisms, SnpEff: SNPs in  
794 the genome of *Drosophila melanogaster* strain w1118; iso-2; iso-3. *Fly (Austin)*. 2012;6:  
795 80–92. doi:10.4161/fly.19695
- 796 67. Chang CC, Chow CC, Tellier LCAM, Vattikuti S, Purcell SM, Lee JJ. Second-generation  
797 PLINK: Rising to the challenge of larger and richer datasets. *GigaScience*. 2015;4.  
798 doi:10.1186/s13742-015-0047-8
- 799 68. Purcell S, Neale B, Todd-Brown K, Thomas L, Ferreira MAR, Bender D, et al. PLINK: A  
800 tool set for whole-genome association and population-based linkage analyses. *Am J Hum*  
801 *Genet*. 2007;81: 559–575. doi:10.1086/519795
- 802 69. Buckley RM, Davis BW, Brashear WA, Farias FHG, Kuroki K, Graves T, et al. A new  
803 domestic cat genome assembly based on long sequence reads empowers feline genomic  
804 medicine and identifies a novel gene for dwarfism. *PLoS Genet*. 2020;16.  
805 doi:10.1371/journal.pgen.1008926
- 806 70. Price AL, Patterson NJ, Plenge RM, Weinblatt ME, Shadick NA, Reich D. Principal  
807 components analysis corrects for stratification in genome-wide association studies. *Nat*  
808 *Genet*. 2006;38: 904–909. doi:10.1038/ng1847
- 809 71. Zhou X, Stephens M. Genome-wide efficient mixed-model analysis for association studies.  
810 *Nat Genet*. 2012;44: 821–824. doi:10.1038/ng.2310

- 811 72. Liu X, Huang M, Fan B, Buckler ES, Zhang Z. Iterative Usage of Fixed and Random Effect  
812 Models for Powerful and Efficient Genome-Wide Association Studies. *PLoS Genet.*  
813 2016;12: e1005767. doi:10.1371/journal.pgen.1005767
- 814 73. Yin L, Zhang H, Tang Z, Xu J, Yin D, Zhang Z, et al. rMVP: A Memory-efficient,  
815 Visualization-enhanced, and Parallel-accelerated tool for Genome-Wide Association Study.  
816 *Genomics Proteomics Bioinformatics.* 2021; S1672-0229(21)00050–4.  
817 doi:10.1016/j.gpb.2020.10.007
- 818 74. D. Turner S. qqman: an R package for visualizing GWAS results using Q-Q and manhattan  
819 plots. *J Open Source Softw.* 2018;3: 731. doi:10.21105/joss.00731
- 820 75. R Core Team. R: A language and environment for statistical computing. *R Found Stat*  
821 *Comput.* 2020.
- 822 76. Hunter JD. Matplotlib: A 2D graphics environment. *Comput Sci Eng.* 2007;9: 90–95.  
823 doi:10.1109/MCSE.2007.55
- 824 77. Pérez F, Granger BE. IPython: A system for interactive scientific computing. *Comput Sci*  
825 *Eng.* 2007;9: 21–29. doi:10.1109/MCSE.2007.53
- 826



## 827 **Supporting information**

828

829 **S1 Fig. LD plots for the GWAS positive controls, using the LMM GWAS results.** (A) *Orange*  
830 locus GWAS, showing the significant association on chromosome X. (B) Factor XII deficiency  
831 GWAS, showing the A1 significant association in the vicinity of the gene *FL2*. Colors indicate the  
832 amount of LD ( $r^2$ ) with the most significant SNP, ranging from black ( $r^2 < 0.2$ ) to red ( $r^2 > 0.8$ ).

833

834 **S2 Fig. Manhattan, QQ and LD plots for IBD using the FarmCPU GWAS results.** On the  
835 Manhattan plot, the red dashed line is the Bonferroni-corrected significance threshold. Inflation  
836 factor ( $\lambda$ ) is shown on the QQ plot.

837

838 **S3 Fig. Manhattan and QQ plots for diseases that did not reach genome-wide significance in**  
839 **the LMM GWAS.** On Manhattan plots, the red line is Bonferroni-corrected significance  
840 threshold, and the blue line is Bonferroni-corrected significance threshold calculated using  
841 unlinked SNPs. Inflation factors ( $\lambda$ ) are shown on QQ plots.

842

843 **S4 Fig. Age distribution of cases and controls.** (A) HCM, (B) hyperthyroidism, (C) DM, (D)  
844 CKD, (E) chronic enteropathy, (F) IBD, (G) SCAL, (H) all GI, (I) FEK, (J) hypercalcemia. Age  
845 (in months) is shown on the X axis and number of cats is shown on the Y axis. Cases are the pink  
846 bars and controls are the blue bars.

847

848 **S5 Fig. Weight distribution of cases and controls for DM.** Weight (in kg) is shown on the X  
849 axis and number of cats is shown on the Y axis. Cases are the pink bars and controls are the blue

850 bars. Note that weight data was only available for 53 of the 67 cases, and 339 of the 366 controls  
851 used in the GWAS.

852

853 **S1 Table. Significant association LMM GWAS results on chromosome X for the presence of**  
854 **orange fur in random bred cats.**

855

856 **S2 Table. Three most significant associations for each disease from the FarmCPU GWAS**  
857 **results.**

858

859 **S3 Table. Frequencies, odds ratios, and *P*-values for SNPs associated with complex diseases**  
860 **in different breeds and random bred cats.**

861

862 **S4 Table. Non-significant associations identified for complex diseases using a LMM GWAS**  
863 **design.**

864

865 **S5 Table. Numbers of individual cats from each breed and random bred group for each**  
866 **phenotype.**

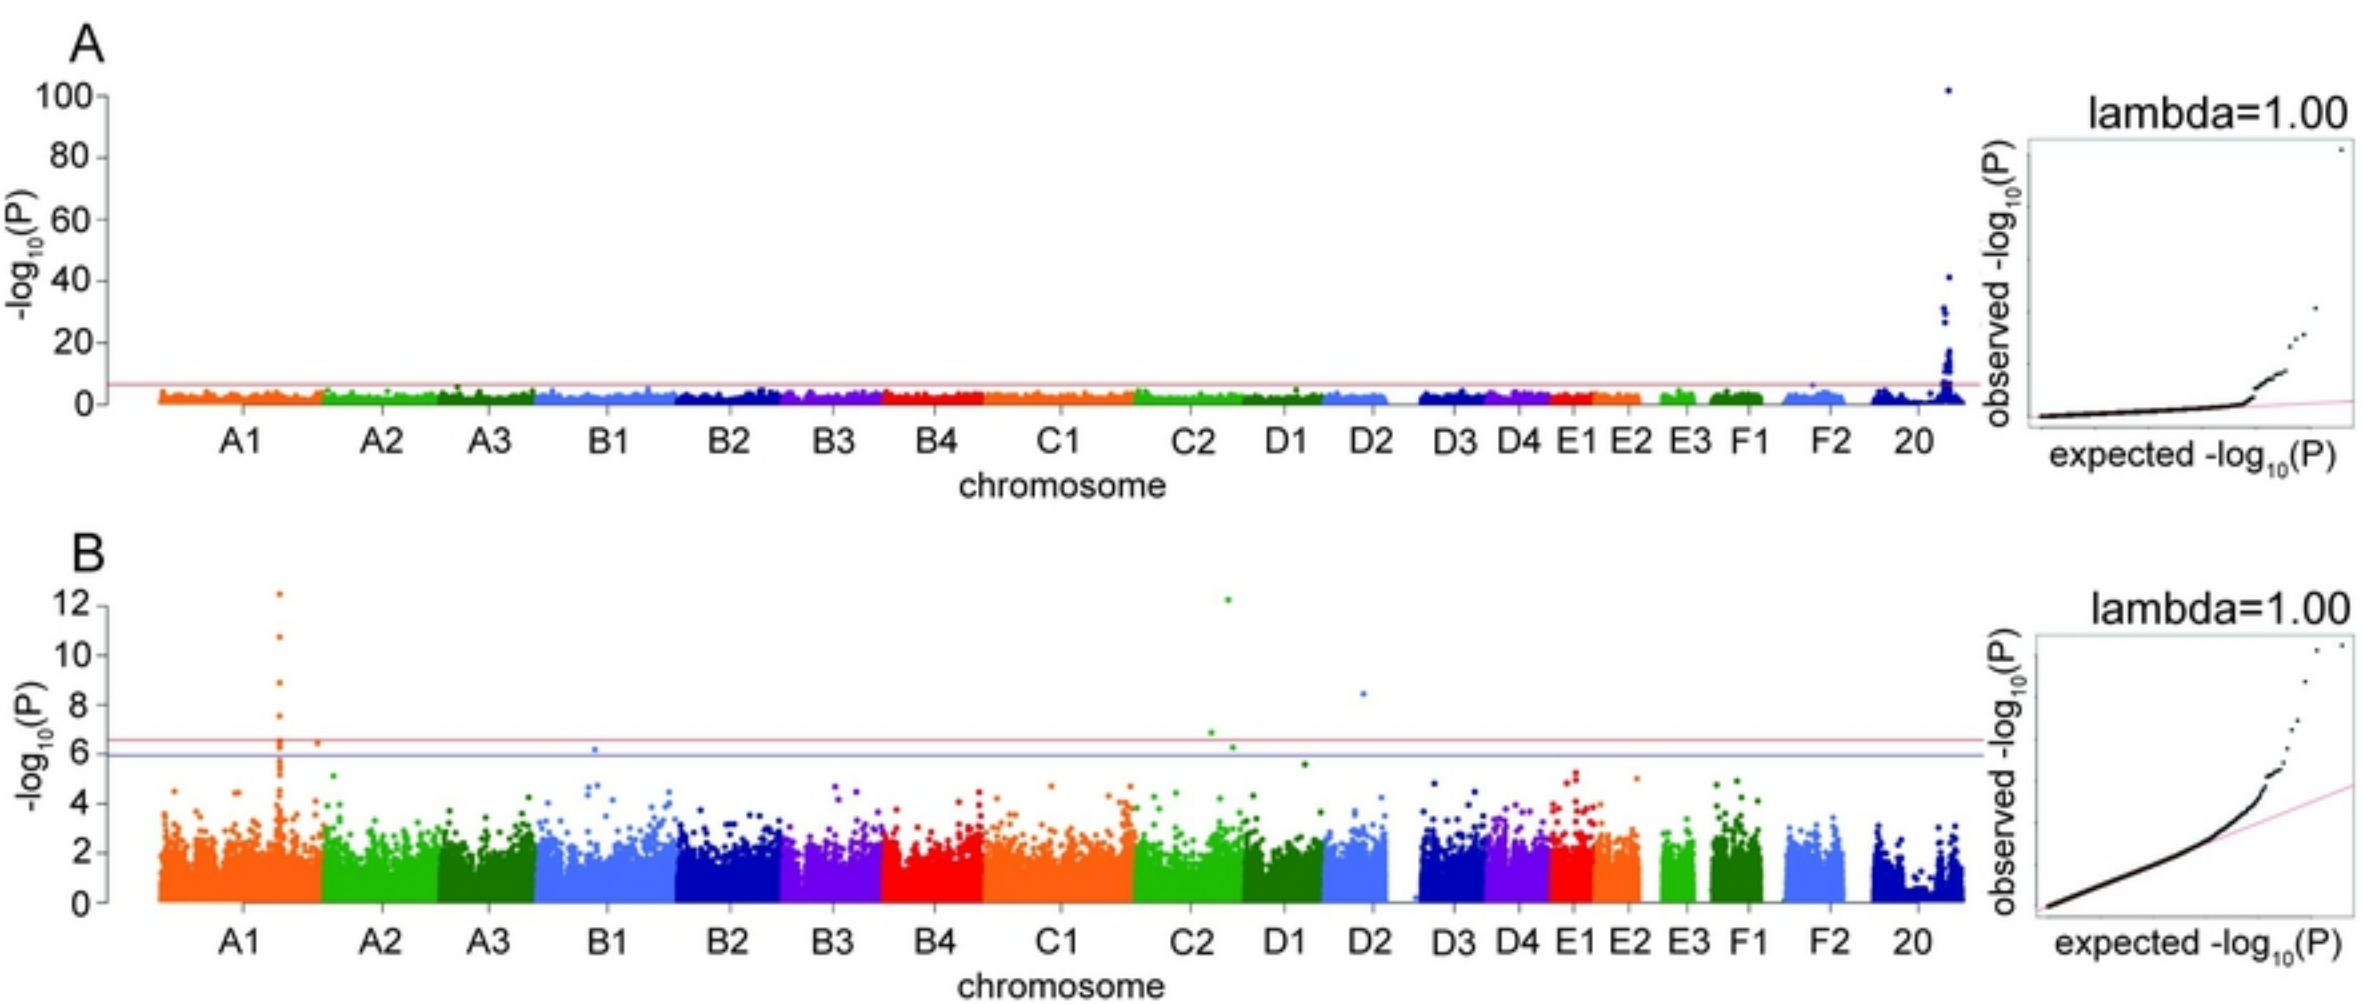

Figure 2

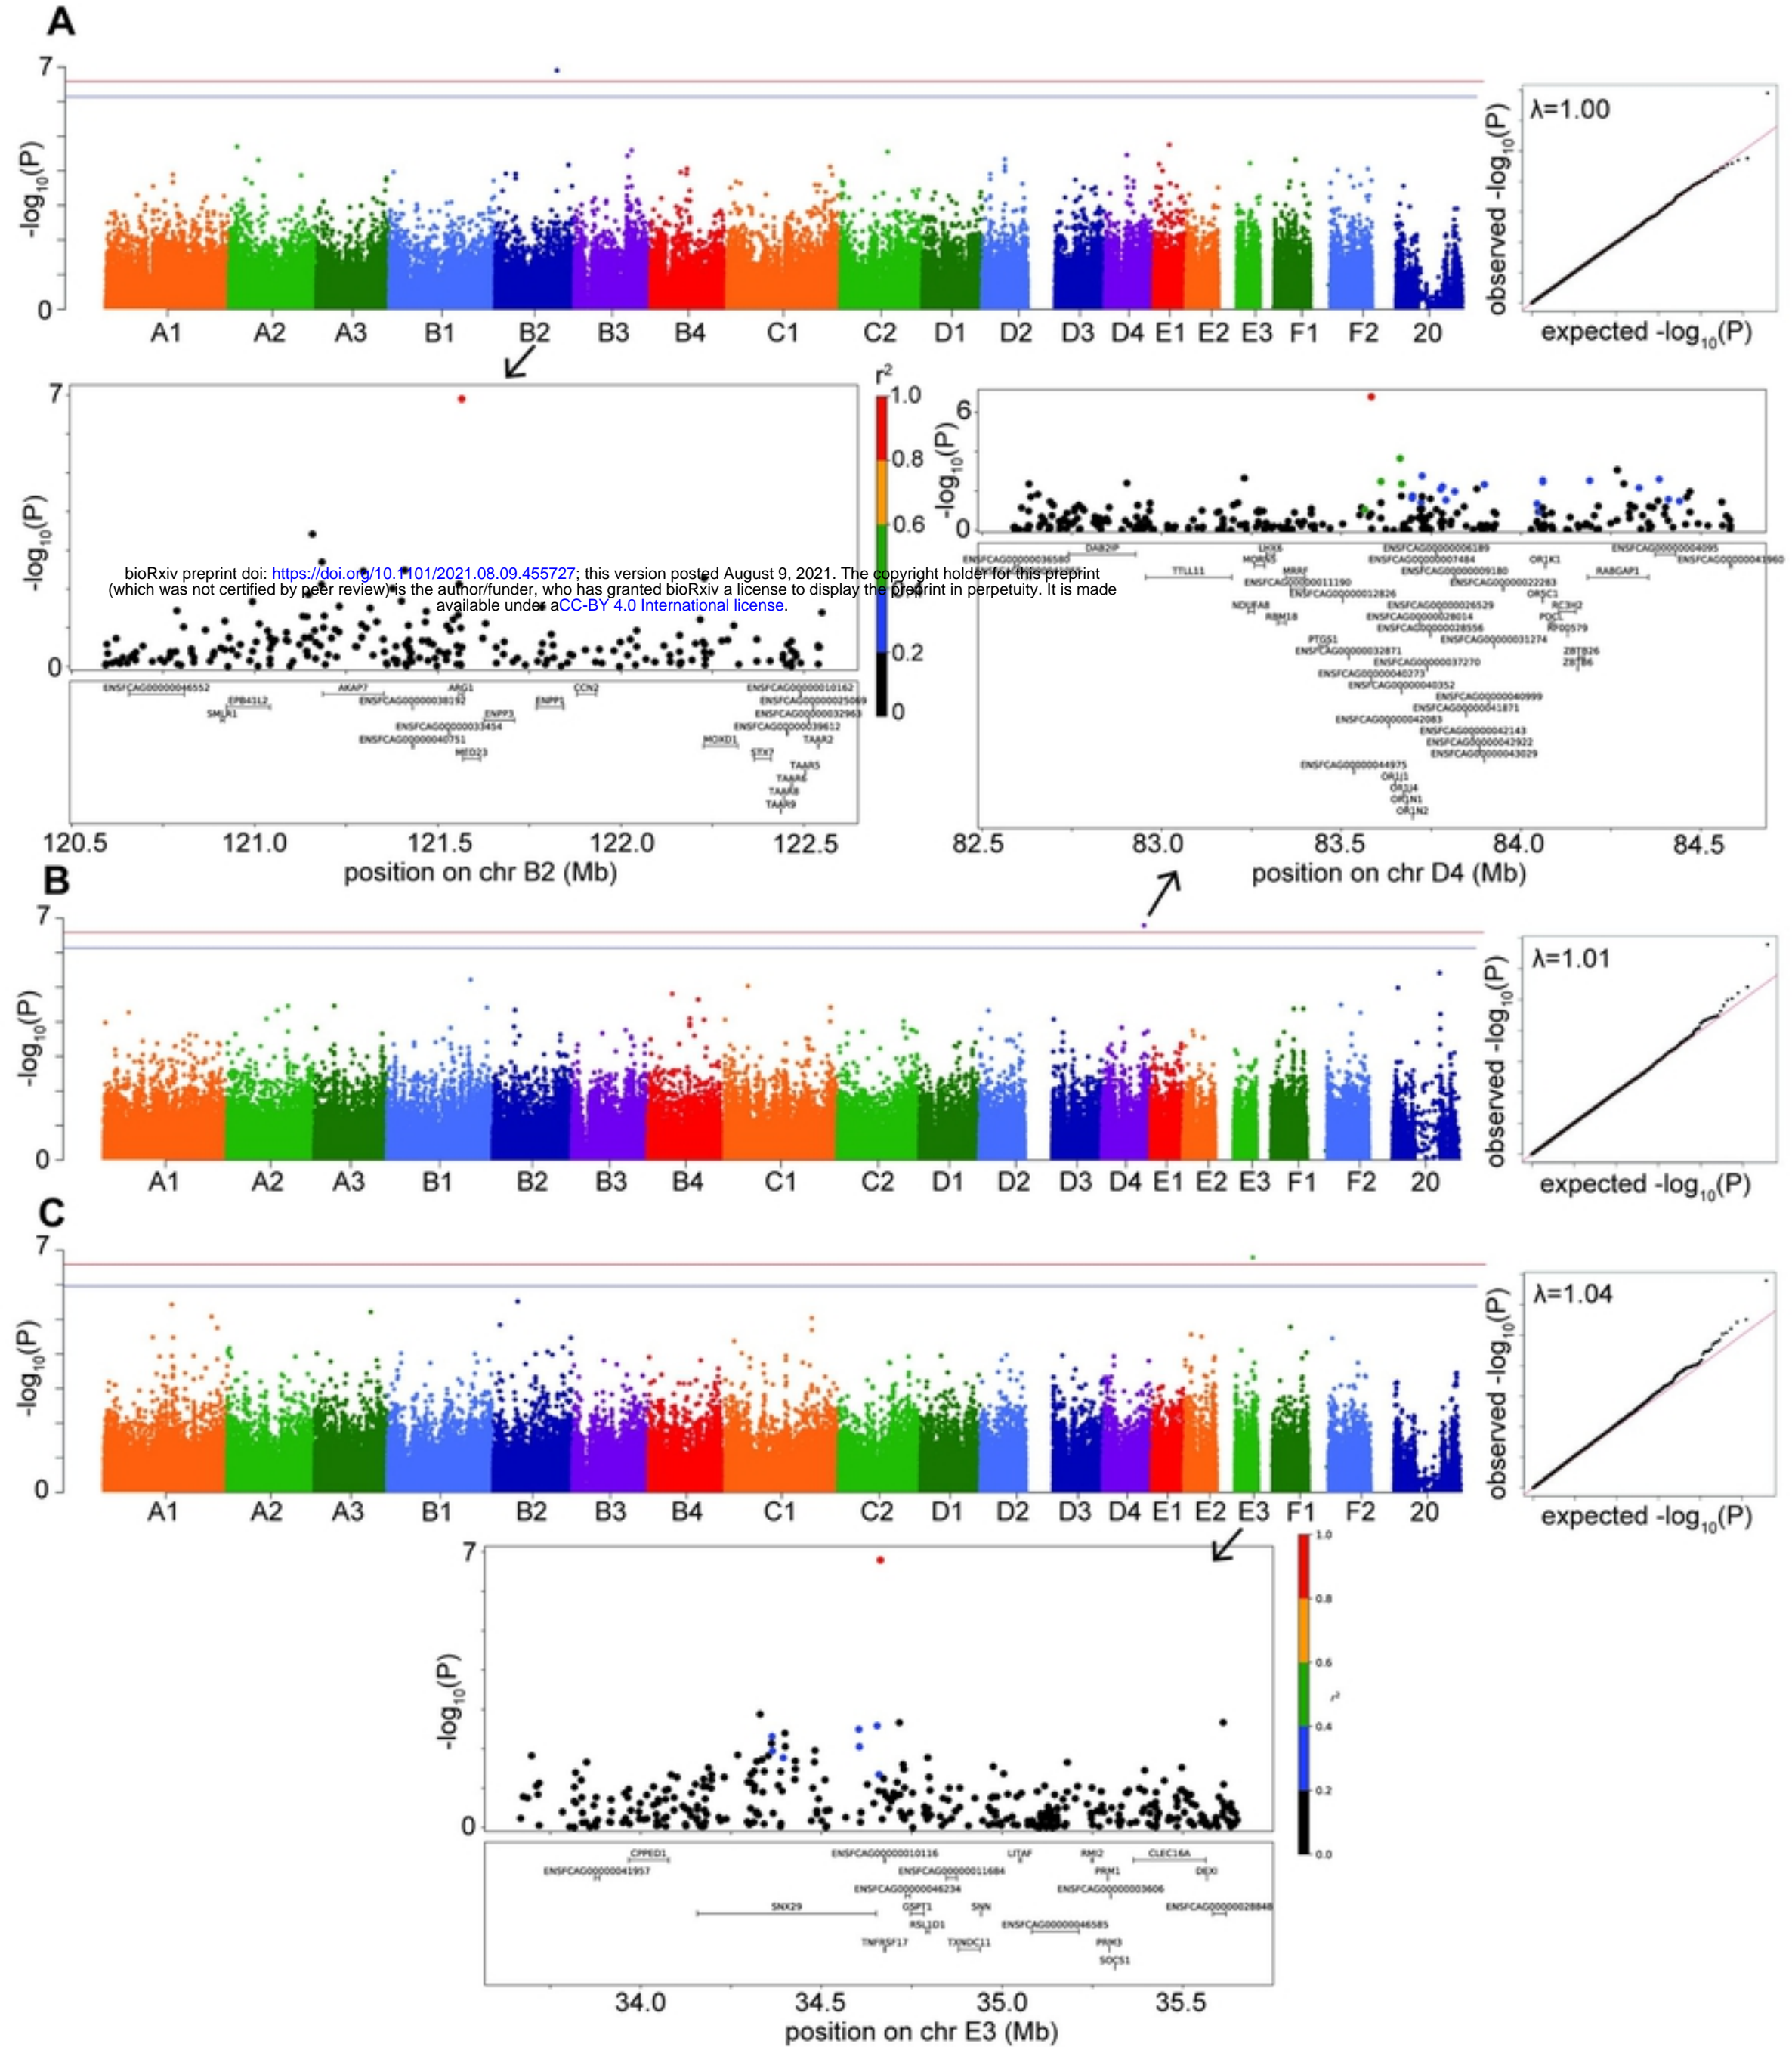

Figure 3



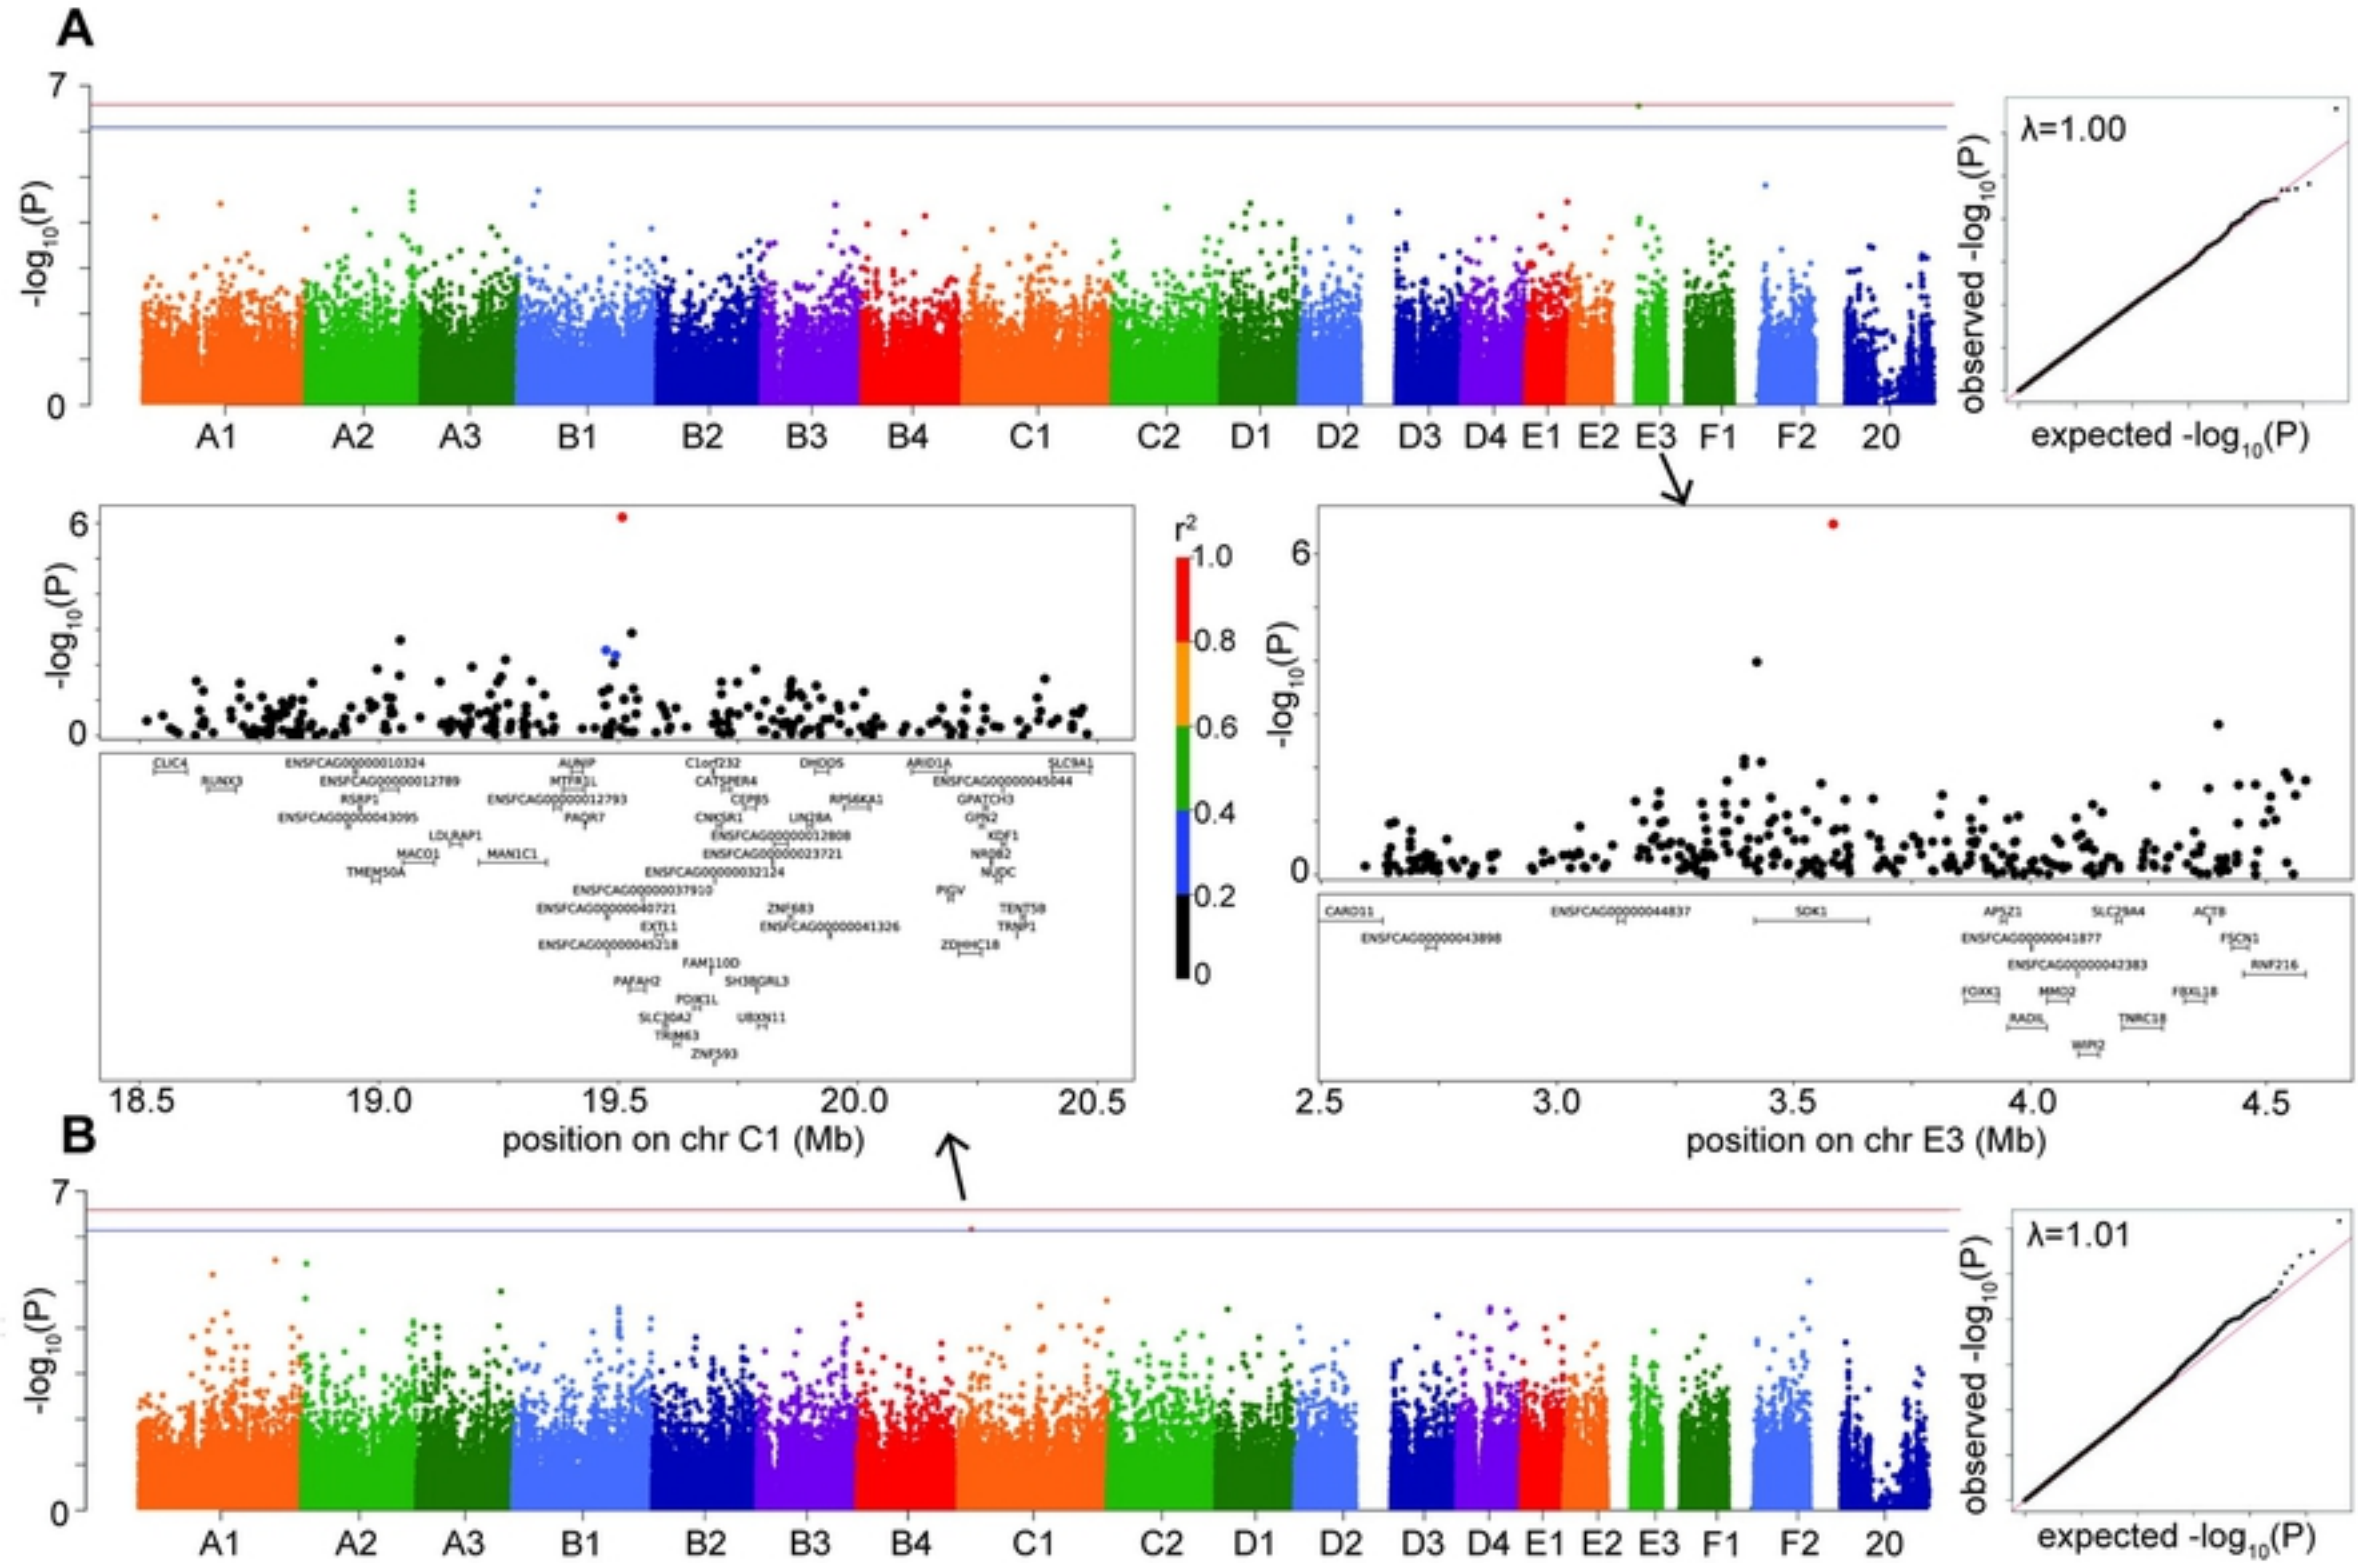

Figure 4

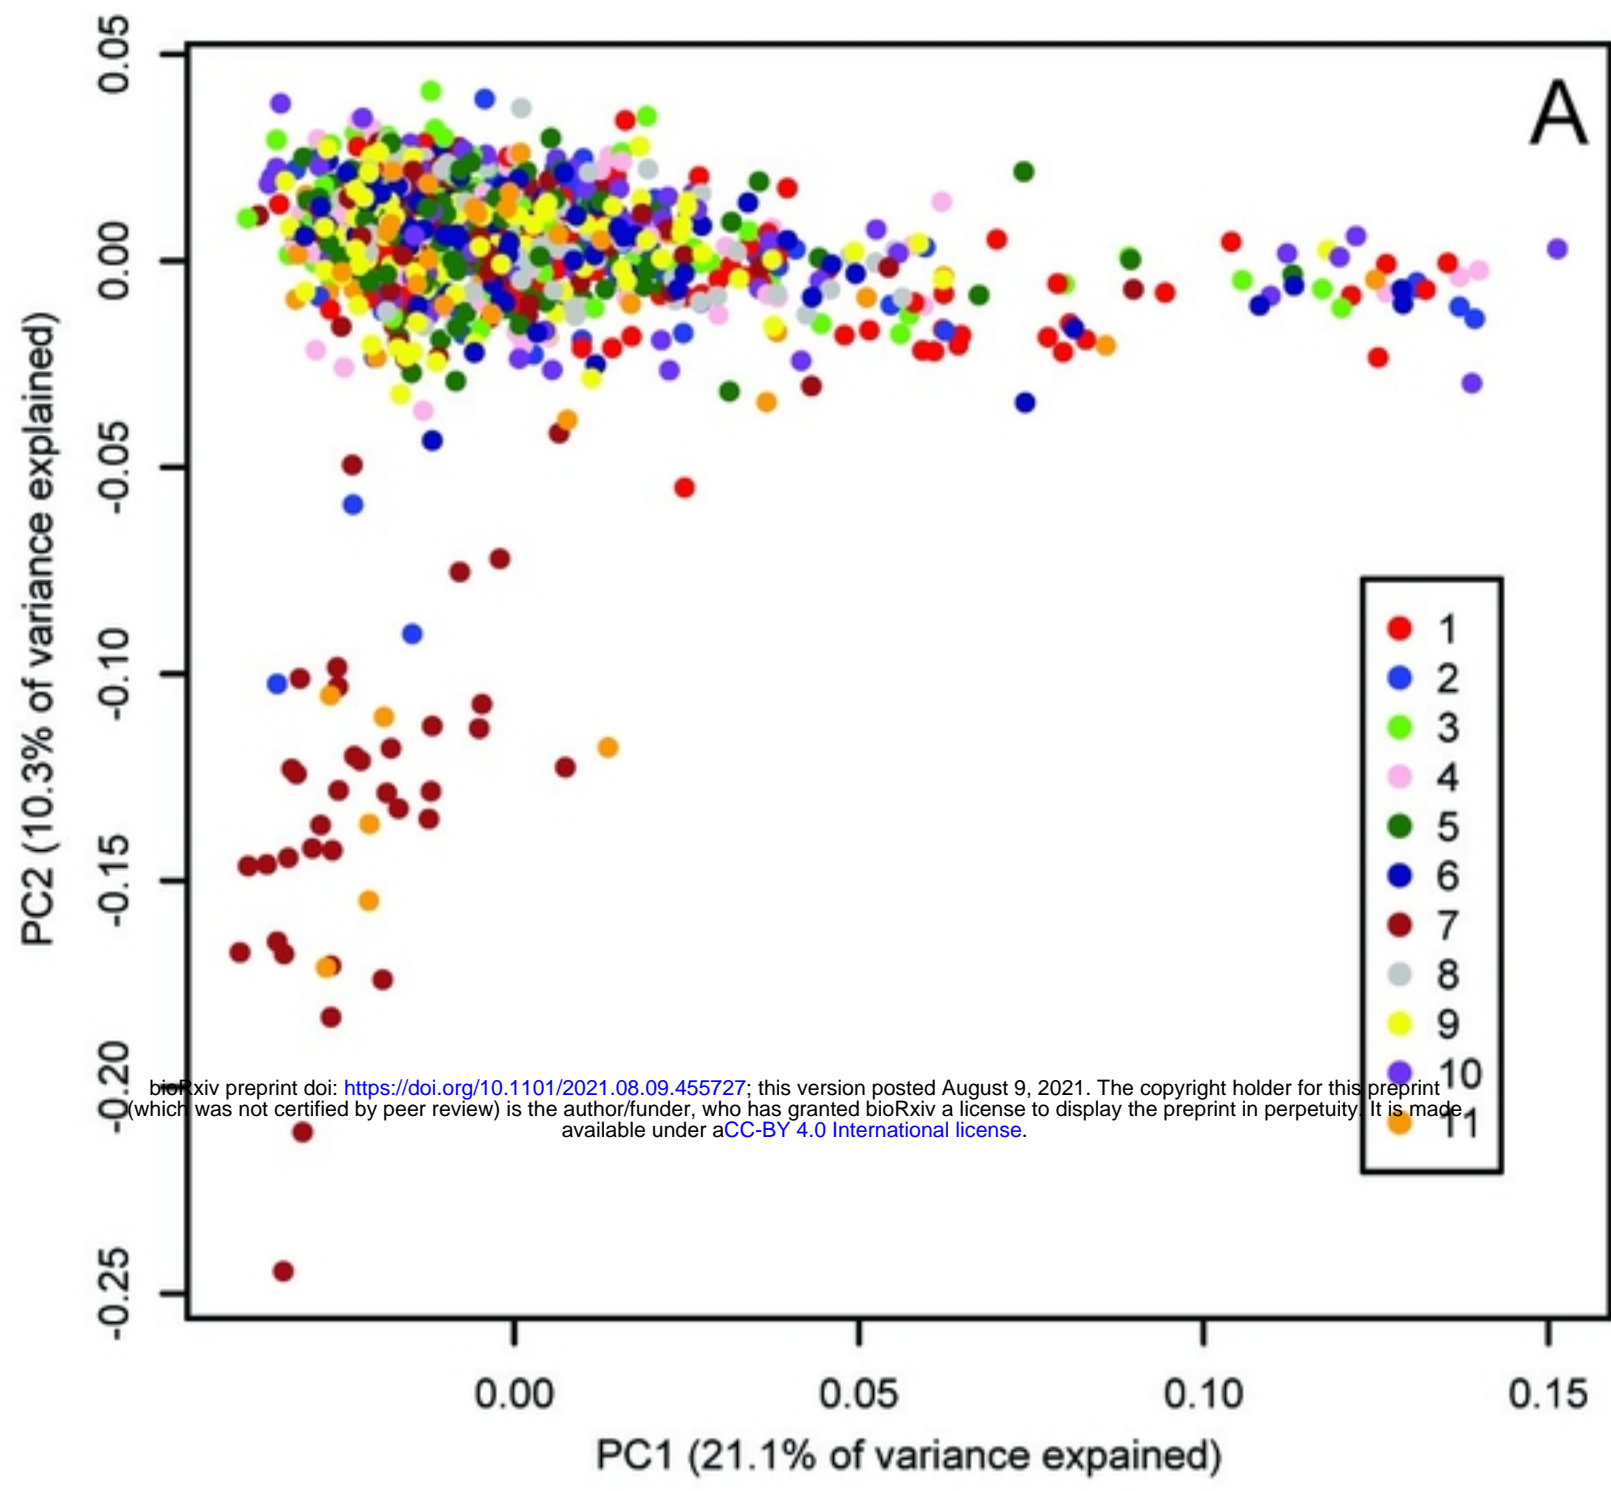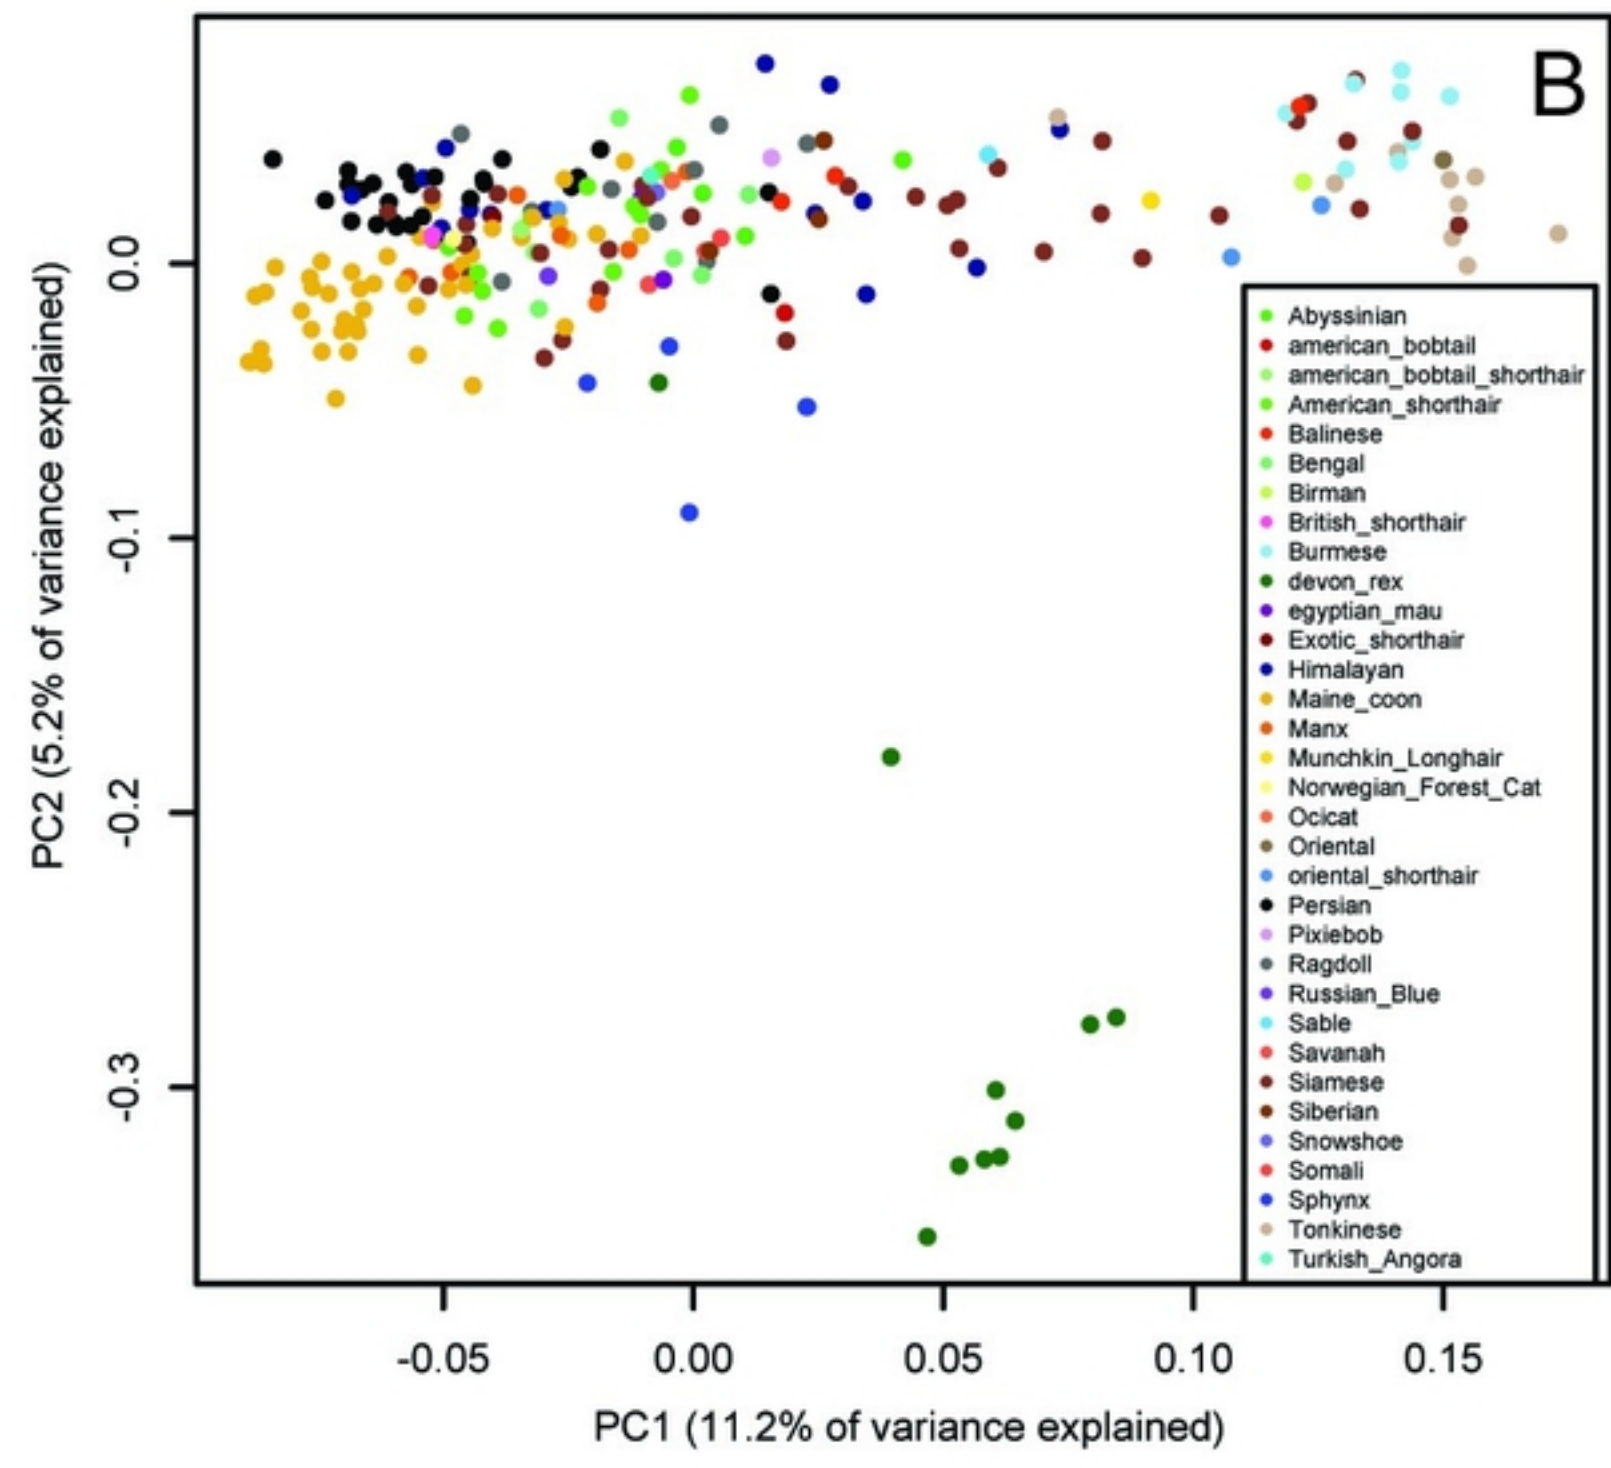

Figure 1
